# Supplementary material for: Circular RNA SAMD4A controls adipogenesis in obesity through the miR-138-5p/EZH2 axis
Source: PubMed Central journal article supplement (PMC7150479; doi:10.7150/thno.42417), 2020-03-26
Supplement: thnov10p4705s1.pdf [file thnov10p4705s1.pdf]

Supplementary Figures

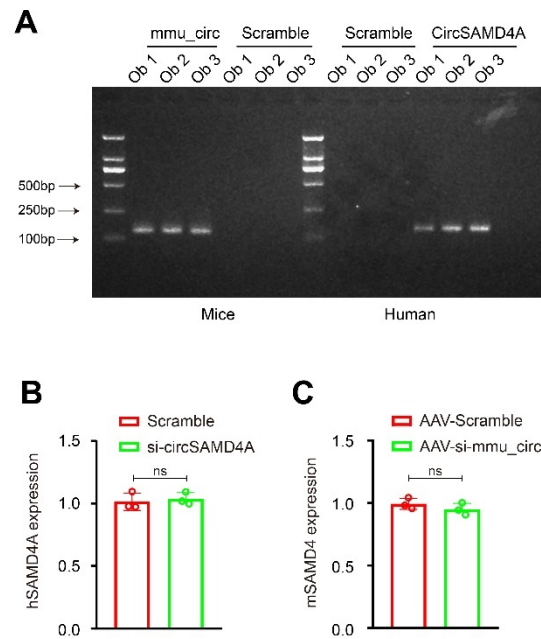

Figure S1 The expression of hSAMD4A and mSAMD4 was detected following circRNA specific knockdown in adipocytes. **(A)** PCR product of circSAMD4A and mmu\_circ\_0000529 was analyzed using agarose gel electrophoresis. **(B)** The expression of hSAMD4A was detected using qRT-PCR following siRNA transfection in human adipocytes. **(C)** The expression of mSAMD4 was detected using qRT-PCR following AAV9 transfection in mouse adipocytes. Data are presented as means  $\pm$  SD; significant difference was identified with Student's t test. \* $P < 0.05$ ; \*\* $P < 0.01$ ; ns (not significant).

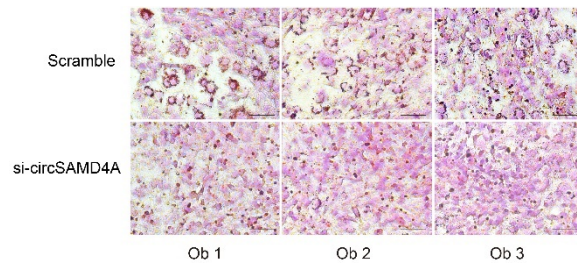

Figure S2 Representative Oil red O staining of differentiated preadipocytes after transfection with circSAMD4A specific siRNA versus scramble controls. Images are representative of three independent experiments. Scale bar = 50µm.

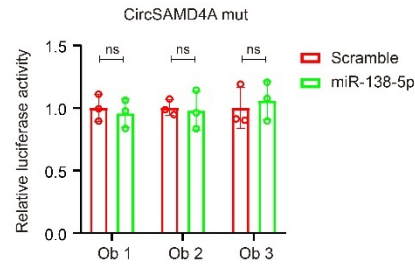

Figure S3 Luciferase assay where preadipocytes were co-transfected with a scrambled control, miR-138-5p mimic, and a luciferase reporter plasmid containing a circSAMD4A construct with mutated miR-138-5p binding sites (circSAMD4A-mut). Data are presented as means ± SD; significant difference was identified with Student's t test. \*P < 0.05; \*\*P < 0.01; ns (not significant).

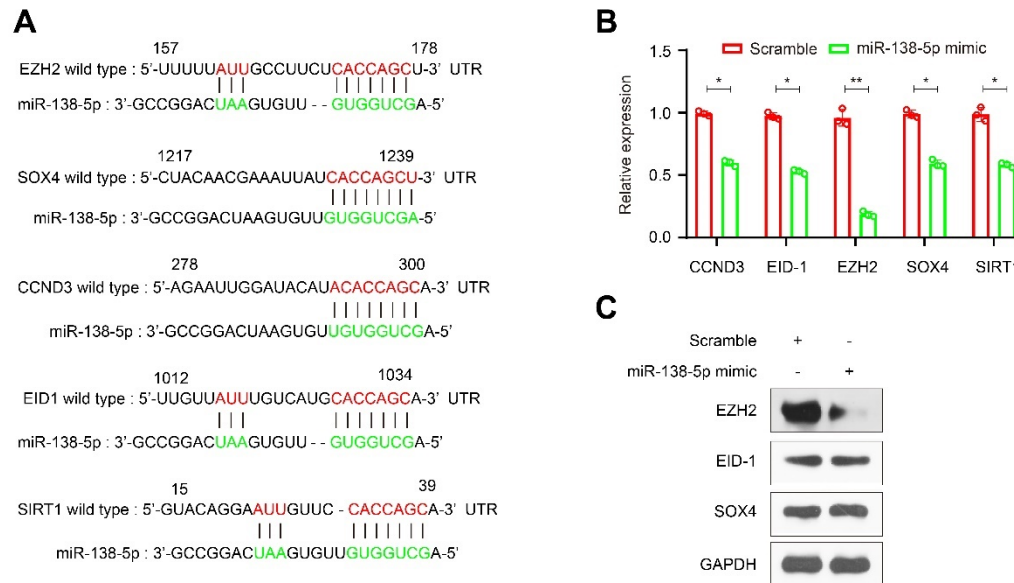

Figure S4 The predicted target molecular of miR-138-5p. **(A)** Schematic of the predicted miR-138-5p sites in the 3'-UTR of target mRNAs. **(B)** The predicted target mRNA expression after transfection with miR-138-5p mimics was quantified with qRT-PCR. **(C)** Proteins expression after transfection with miR-138-5p mimics was analyzed using Western blot with qRT-PCR Data are presented as means  $\pm$  SD; significant difference was identified with Student's t test. \*P < 0.05; \*\*P < 0.01; ns (not significant).

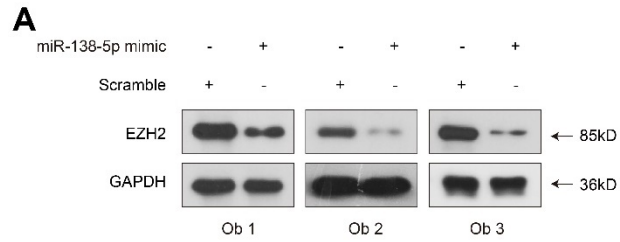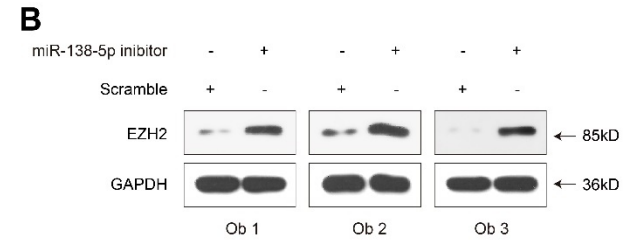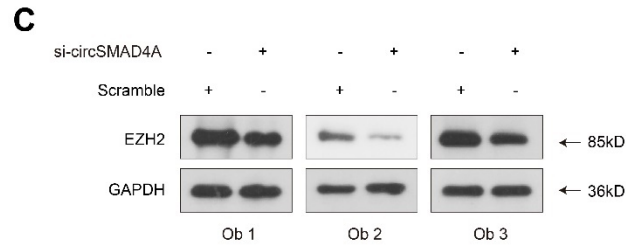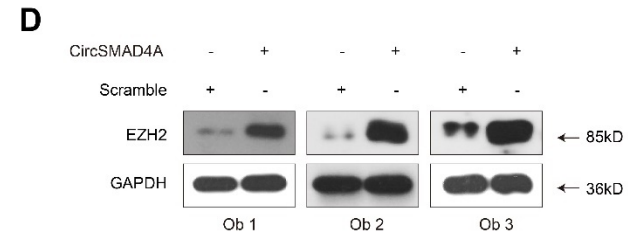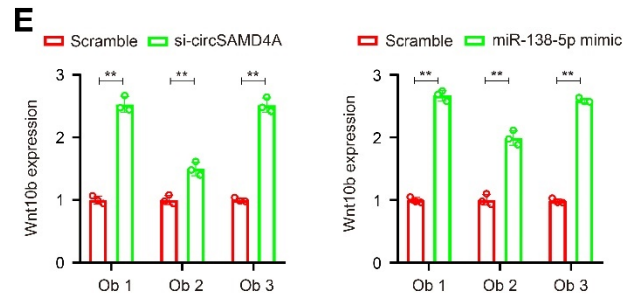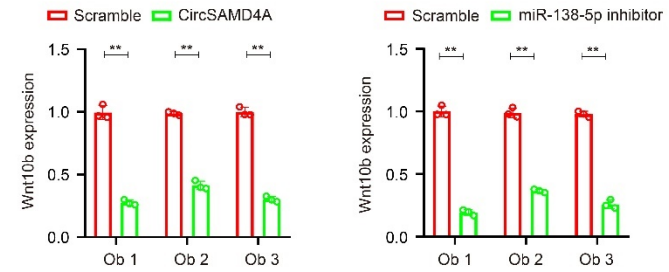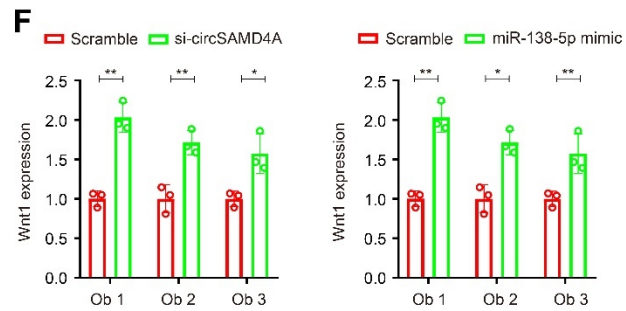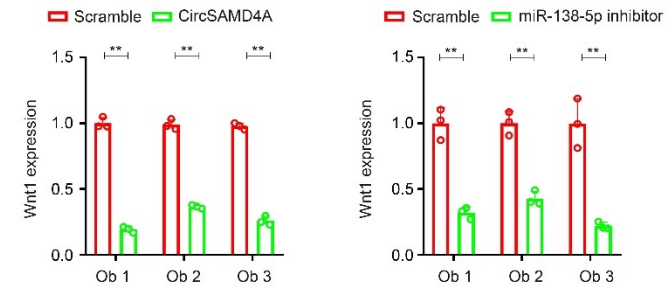

Figure S5 EZH2 and downstream gene expression was influenced by circSAMD4A and miR-138-5p. The EZH2 expression was analyzed using Western blot after (A) miR-138-5p mimic or (B) inhibitor transfection in adipocytes. EZH2 expression was analyzed using Western blot after circSAMD4A (C) siRNA or (D) over-expression vector transfection in adipocytes. qRT-PCR assay was performed to analyze the expression of (E) Wnt10b and (F) Wnt1 after circSAMD4A or miR-138-5p changed in adipocytes from obesity patients. Data are presented as means  $\pm$  SD; significant difference was identified with Student's t test. \*P < 0.05; \*\*P < 0.01; ns (not significant).

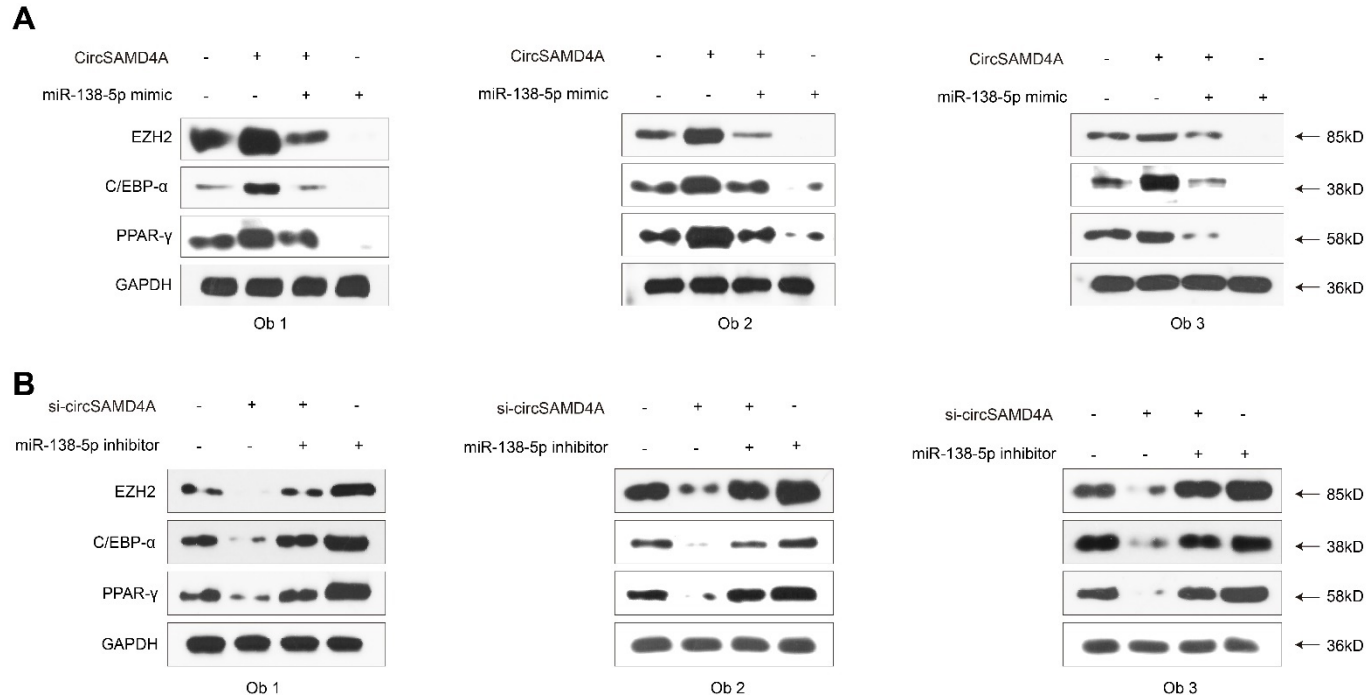

Figure S6 CircSAMD4A counteracted miR-138-5p to promote EZH2 and downstream gene expression. (A) The expression of EZH2 was detected using Western blot following circSAMD4A overexpression vector or miR-138-5p mimic transfection in adipocytes from obesity patients. (B) The expression of EZH2 was detected using Western blot following circSAMD4A specific siRNA or miR-138-5p inhibitor transfection in adipocytes from obesity patients.

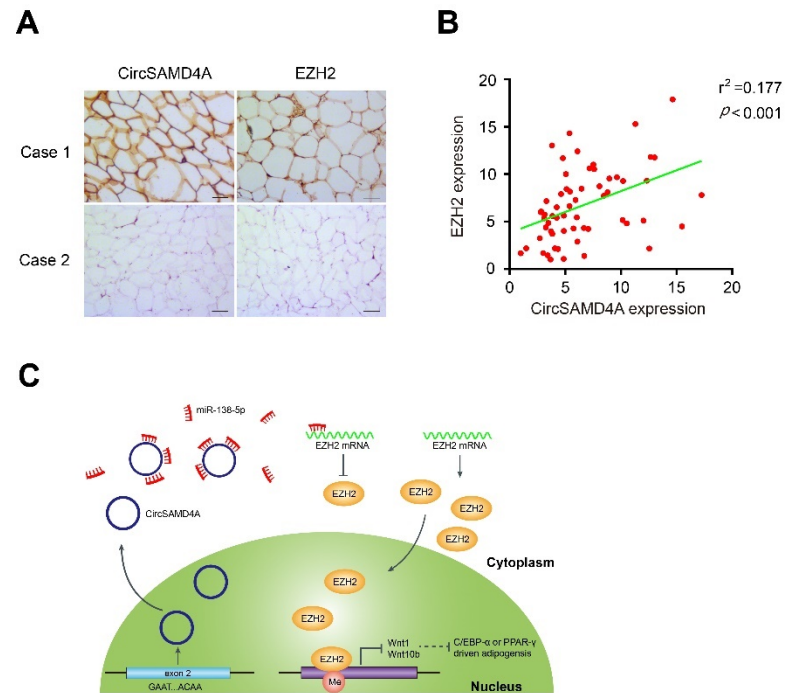

Figure S7 CircSAMD4A was positively correlated with EZH2 expression. **(A)** Representative adipose tissue images showing circSAMD4A in situ hybridization and EZH2 immunohistochemistry. **(B)** Analysis of circSAMD4A (qRT-PCR) and EZH2 (IHC) in adipose tissues, showing linear regressions and significant Pearson correlations. **(C)** CircSAMD4A might induce differentiation via the miR-138-5p/EZH2 signaling pathway.

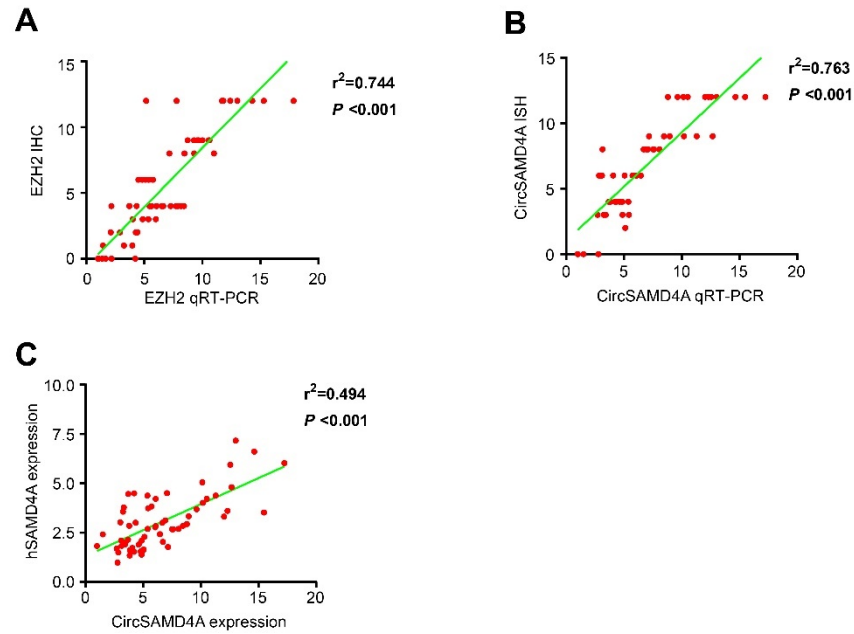

FigureS8 Pearson correlation analysis in adipose tissues. **(A)** Pearson correlation between Immunohistochemistry (IHC) analysis and qRT-PCR analysis of EZH2 in the adipose tissues of 60 obese patients. **(B)** Pearson correlation between ISH analysis and qRT-PCR analysis of circSAMD4A in the adipose tissues of 60 obese patients. **(C)** Pearson correlation between circSAMD4A expression and hSAMD4A expression in the adipose tissues of 60 obese patients. Data are presented as means  $\pm$  SD; significant difference was identified with Student's t test. \* $P < 0.05$ ; \*\* $P < 0.01$ ; ns (not significant).

**A**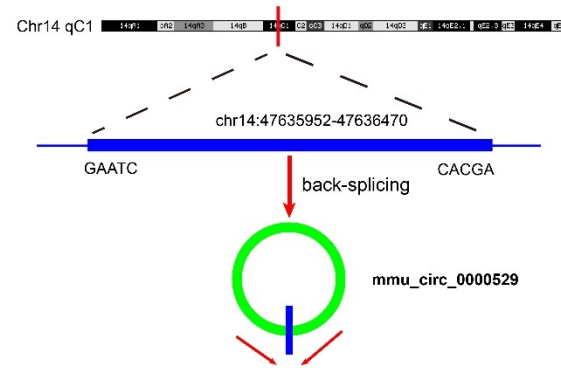**B**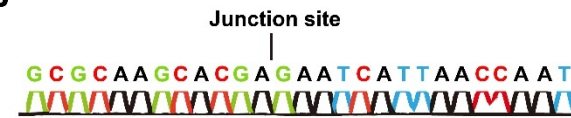**mmu\_circ\_0000529**

GAATCATTAACCAATGGCAACAGGAATCCAAGGATAAAGTGATTTCCCTT  
 CTGCTAACTCACCTGCCTTTGCTGAAGCCAGGAAACCTCGACGCGAAAAGC  
 AGAGTATATGAAACTGCTGCCCAAGATCCTGGCACACTCTATCGAACACA  
 ACCAGCACATTGAGGAGAGCAGGCAGCTGCTGTCCATGCTTTGATCCAC  
 CCAGCCACTTCCTTGGAAAGACCGCAGCGCACTAGCCATGTGGCTGAATCA  
 CTTGGAGGACCGCACATCCACCAGCTTTGGTAGCCAGAACCAGGCCGCT  
 CGGACTCTGTGGATTATGGACAGACGCATTACTATCACAAAAGACAGAAC  
 TCTGACGATAAGCTCAATGGCTGGCAGAACTCTCGGGATTCTGGGATTTG  
 CATCAGTGCCTCCAACCTGGCAGGACAAGAGCCTGGGCTGTGAGAATGGCC  
 ATGTGCCCTCTACTCTTCTCGTCTGTCCCTGCCACAATCAACACGATT  
 GGAACCGGGCAAGCACGA

**C**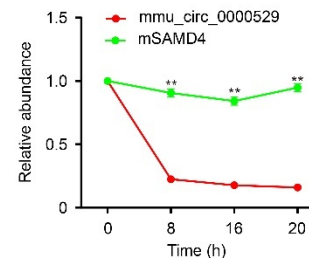**D**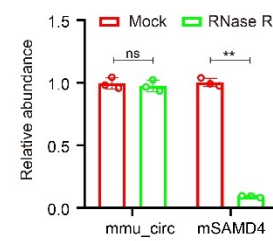



Figure S9 Characterization of mmu\_circ\_0000529 in preadipocytes. **(A)** The genomic location of the mSAMd4 gene and of mmu\_circ\_0000529. **(B)** Sanger sequencing showing the “head-to-tail” splicing of mmu\_circ\_0000529 in the preadipocytes. **(C)** qRT-PCR quantification of mmu\_circ\_0000529 and mSAMd4 mRNA expression in preadipocytes after treatment with RNase R. **(D)** qRT-PCR quantification of mmu\_circ\_0000529 and mSAMd4 mRNA expression in preadipocytes after treatment with Actinomycin D. Data are presented as means  $\pm$  SD; significant difference was identified with Student's t test. \* $P < 0.05$ ; \*\* $P < 0.01$ ; ns (not significant).

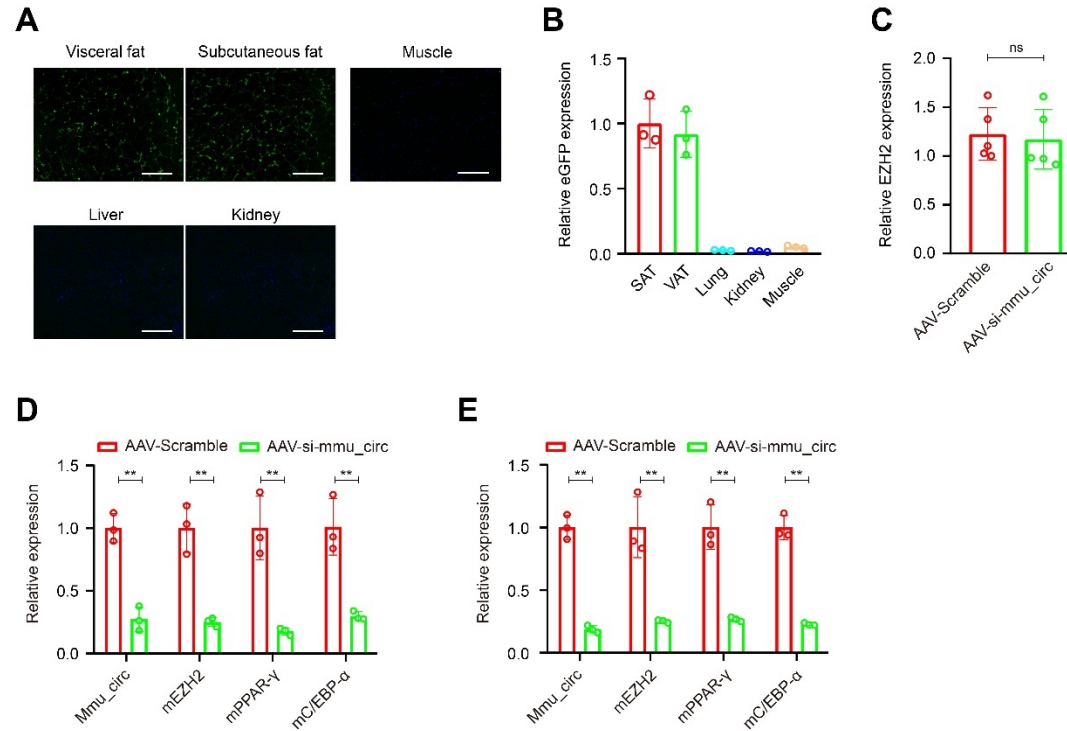

Figure S10 AAV9 administration targeted adipocytes and inhibited preadipocytes differentiation gene expression. **(A)** eGFP expression was observed in SAT, VAT, liver and kidney tissues of obese mice 14 days after AAV9 administration. **(B)** Relative expression of eGFP was detected in adipocytes and off-target control tissue. **(C)** Relative EZH2 expression in muscle of mice was analyzed after vector administration. mmu\_circ\_000052, mEZH2, mC/EBP- $\alpha$  and mPPAR- $\gamma$  expression were analyzed in **(D)** subcutaneous fat (SAT) and **(E)** visceral adipose tissue (VAT) of mice after vector administration. Data are presented as means  $\pm$  SD; significant difference was identified with Student's t test. \* $P < 0.05$ ; \*\* $P < 0.01$ ; ns (not significant). Scale bar = 250 $\mu$ m.

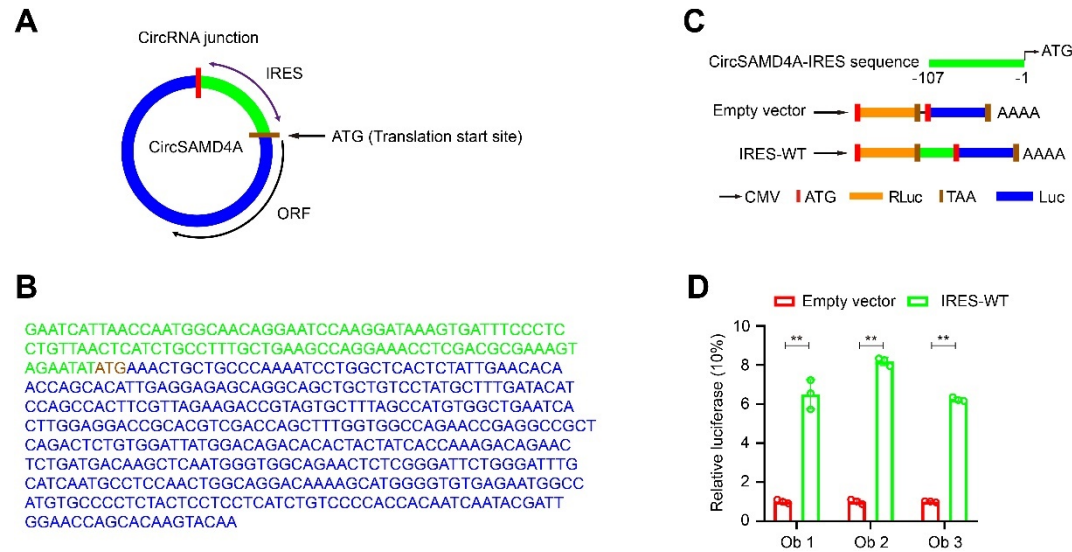

Figure S11 Evaluation of the coding ability of circSAMD4A. **(A)** The putative open reading frame (ORF) in circSAMD4A. **(B)** The sequences of the putative ORF are shown in blue, internal ribosomal entrance site (IRES) sequences are shown in green. **(C)** IRES sequences in circSAMD4A were cloned between RLuc and Luc reporter genes with independent start and stop codons. **(D)** The relative luciferase activity of Luc/ RLuc in the above vectors was tested. Data are presented as means  $\pm$  SD; significant difference was identified with Student's t test. \* $P < 0.05$ ; \*\* $P < 0.01$ ; ns (not significant).

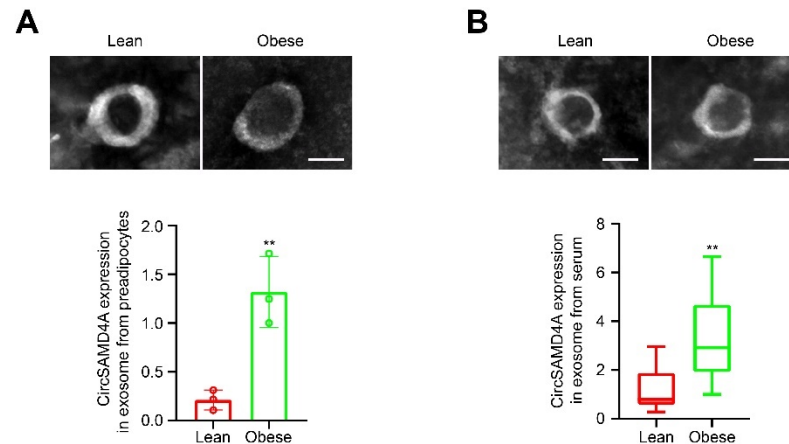

Figure S12 CircSAMD4A expression in exosome from culture medium of preadipocytes and serum. **(A)** Upper: The transmission electron micrograph showed exosomes from preadipocytes of obese and lean patients. Scale bar=50nm. Lower: The expression of circSAMD4A was detected in exosomes from preadipocytes of obese and lean patients using qRT-PCR. **(B)** Upper: The transmission electron micrograph showed exosomes from serum of obese and lean patients. Lower: The expression of circSAMD4A was detected in exosomes from serum of obese and lean patients using qRT-PCR. Scale bar=50nm. Data are presented as means  $\pm$  SD; significant difference was identified with Student's t test. \*P < 0.05; \*\*P < 0.01; ns (not significant).

## Supplementary Tables

Table S1 Obese and lean patients used in the study

|       | Name  | Gender <sup>a</sup> | Age (year) | Diabetes <sup>b</sup> | Hyperuricemia <sup>c</sup> (HUA) | Hyperlipemia <sup>d</sup> (HLP) | Obstructive sleep apnea syndrome <sup>e</sup> (OSAS) | Hyperinsulinemia <sup>f</sup> (HINS) | Systolic BP (mm Hg) | Diastolic BP (mm Hg) | Preoperative weight(kg) | Height (cm) | Postoperative weight (kg) |
|-------|-------|---------------------|------------|-----------------------|----------------------------------|---------------------------------|------------------------------------------------------|--------------------------------------|---------------------|----------------------|-------------------------|-------------|---------------------------|
|       | No 1  | 0                   | 37         | 0                     | 0                                | 1                               | 1                                                    | 1                                    | 130                 | 82                   | 70                      | 156         | 62                        |
|       | No 2  | 1                   | 33         | 1                     | 0                                | 1                               | 1                                                    | 0                                    | 160                 | 105                  | 130                     | 188         | 103                       |
|       | No 3  | 1                   | 30         | 1                     | 0                                | 1                               | 1                                                    | 0                                    | 146                 | 80                   | 123                     | 179         | 95                        |
|       | No 4  | 1                   | 23         | 0                     | 1                                | 1                               | 1                                                    | 0                                    | 125                 | 85                   | 121                     | 175         | 90                        |
|       | No 5  | 1                   | 31         | 0                     | 0                                | 1                               | 1                                                    | 0                                    | 146                 | 86                   | 120                     | 174         | 71.4                      |
|       | No 6  | 1                   | 34         | 0                     | 0                                | 1                               | 1                                                    | 1                                    | 134                 | 88                   | 97.3                    | 167         | 75                        |
|       | No 7  | 1                   | 28         | 0                     | 0                                | 1                               | 1                                                    | 0                                    | 129                 | 80                   | 129                     | 172         | 77.5                      |
|       | No 8  | 1                   | 19         | 0                     | 1                                | 0                               | 1                                                    | 0                                    | 131                 | 79                   | 130                     | 171         | 75                        |
|       | No 9  | 1                   | 22         | 0                     | 0                                | 1                               | 1                                                    | 0                                    | 135                 | 70                   | 120                     | 180         | 95                        |
| Obese | No 10 | 1                   | 36         | 0                     | 0                                | 1                               | 1                                                    | 0                                    | 128                 | 74                   | 141.5                   | 180         | 75                        |
|       | No 11 | 0                   | 22         | 0                     | 0                                | 1                               | 0                                                    | 0                                    | 140                 | 67                   | 105                     | 163         | 80                        |
|       | No 12 | 0                   | 24         | 0                     | 0                                | 0                               | 1                                                    | 0                                    | 138                 | 76                   | 145                     | 172         | 80                        |
|       | No 13 | 0                   | 20         | 0                     | 0                                | 0                               | 0                                                    | 0                                    | 127                 | 81                   | 93                      | 159         | 55                        |
|       | No 14 | 0                   | 22         | 0                     | 0                                | 1                               | 1                                                    | 0                                    | 112                 | 68                   | 118.5                   | 162         | 50                        |
|       | No 15 | 0                   | 22         | 0                     | 1                                | 1                               | 1                                                    | 0                                    | 112                 | 74                   | 80                      | 162         | 72                        |
|       | No 16 | 1                   | 25         | 0                     | 1                                | 1                               | 1                                                    | 0                                    | 120                 | 78                   | 135                     | 193         | 102                       |
|       | No 17 | 0                   | 22         | 0                     | 0                                | 0                               | 0                                                    | 0                                    | 140                 | 80                   | 152                     | 176         | 62.5                      |

|       |   |    |   |   |   |   |   |     |     |       |     |      |
|-------|---|----|---|---|---|---|---|-----|-----|-------|-----|------|
| No 18 | 0 | 24 | 0 | 1 | 0 | 1 | 0 | 150 | 86  | 150   | 162 | 80   |
| No 19 | 0 | 24 | 1 | 1 | 1 | 1 | 0 | 122 | 74  | 123   | 161 | 76.3 |
| No 20 | 0 | 23 | 0 | 0 | 1 | 1 | 0 | 136 | 86  | 115   | 160 | 67.9 |
| No 21 | 0 | 32 | 0 | 0 | 1 | 1 | 0 | 134 | 76  | 91    | 155 | 65   |
| No 22 | 0 | 30 | 0 | 0 | 1 | 0 | 0 | 111 | 76  | 72    | 155 | 61   |
| No 23 | 0 | 44 | 0 | 0 | 1 | 1 | 0 | 138 | 90  | 73    | 158 | 62   |
| No 24 | 0 | 26 | 0 | 0 | 0 | 1 | 0 | 121 | 70  | 120   | 168 | 92.3 |
| No 25 | 0 | 43 | 0 | 0 | 1 | 1 | 0 | 125 | 84  | 84    | 157 | 68   |
| No 26 | 0 | 19 | 1 | 0 | 0 | 0 | 0 | 155 | 114 | 103   | 164 | 65   |
| No 27 | 0 | 30 | 0 | 0 | 0 | 0 | 0 | 112 | 69  | 84    | 164 | 72   |
| No 28 | 0 | 33 | 0 | 0 | 1 | 0 | 0 | 100 | 70  | 92    | 162 | 74   |
| No 29 | 0 | 31 | 0 | 1 | 1 | 0 | 1 | 128 | 74  | 69    | 153 | 59   |
| No 30 | 0 | 31 | 0 | 0 | 0 | 0 | 0 | 152 | 106 | 75.5  | 153 | 64   |
| No 31 | 0 | 26 | 0 | 0 | 0 | 0 | 0 | 124 | 74  | 79    | 159 | 64.8 |
| No 32 | 0 | 28 | 0 | 0 | 0 | 1 | 0 | 136 | 96  | 95    | 161 | 72.7 |
| No 33 | 0 | 35 | 0 | 0 | 0 | 1 | 0 | 144 | 87  | 94    | 160 | 55   |
| No 34 | 0 | 28 | 0 | 0 | 1 | 1 | 0 | 110 | 78  | 74    | 157 | 62   |
| No 35 | 0 | 21 | 0 | 0 | 0 | 0 | 0 | 120 | 78  | 105   | 168 | 80.7 |
| No 36 | 0 | 33 | 0 | 0 | 1 | 1 | 0 | 116 | 74  | 100   | 162 | 73.7 |
| No 37 | 0 | 39 | 0 | 0 | 1 | 0 | 0 | 115 | 75  | 71    | 147 | 58   |
| No 38 | 0 | 28 | 0 | 0 | 1 | 1 | 0 | 125 | 94  | 114   | 178 | 90   |
| No 39 | 0 | 27 | 0 | 0 | 0 | 0 | 0 | 124 | 88  | 118.5 | 162 | 60   |
| No    | 0 | 35 | 1 | 0 | 1 | 0 | 1 | 152 | 105 | 80.5  | 165 | 92.9 |

|      |       |   |    |   |   |   |   |   |     |     |      |     |      |
|------|-------|---|----|---|---|---|---|---|-----|-----|------|-----|------|
|      | 40    |   |    |   |   |   |   |   |     |     |      |     |      |
|      | No 41 | 0 | 37 | 1 | 1 | 1 | 0 | 1 | 140 | 74  | 117  | 164 | 65   |
|      | No 42 | 0 | 29 | 1 | 0 | 0 | 1 | 1 | 120 | 70  | 96.5 | 160 | 75   |
|      | No 43 | 0 | 28 | 0 | 0 | 1 | 0 | 0 | 112 | 63  | 75   | 158 | 64   |
|      | No 44 | 0 | 23 | 0 | 0 | 1 | 1 | 0 | 131 | 85  | 104  | 162 | 80   |
|      | No 45 | 0 | 26 | 1 | 0 | 1 | 1 | 0 | 129 | 83  | 95   | 163 | 73   |
|      | No 46 | 0 | 27 | 0 | 0 | 0 | 1 | 0 | 126 | 74  | 108  | 163 | 52.5 |
|      | No 47 | 0 | 34 | 0 | 0 | 1 | 0 | 1 | 116 | 79  | 100  | 163 | 59.1 |
|      | No 48 | 0 | 24 | 0 | 0 | 0 | 0 | 0 | 102 | 63  | 110  | 170 | 62   |
|      | No 49 | 0 | 31 | 0 | 1 | 0 | 1 | 0 | 127 | 95  | 89   | 154 | 58   |
|      | No 50 | 0 | 29 | 0 | 0 | 0 | 0 | 0 | 120 | 70  | 89   | 160 | 74   |
|      | No 51 | 0 | 24 | 0 | 0 | 0 | 0 | 0 | 126 | 85  | 123  | 164 | 72.2 |
|      | No 52 | 0 | 24 | 0 | 0 | 1 | 1 | 0 | 120 | 74  | 111  | 165 | 60   |
|      | No 53 | 0 | 23 | 0 | 1 | 1 | 1 | 0 | 117 | 80  | 87   | 162 | 72   |
|      | No 54 | 0 | 28 | 0 | 0 | 0 | 1 | 0 | 139 | 84  | 110  | 160 | 84   |
|      | No 55 | 0 | 24 | 1 | 0 | 0 | 1 | 0 | 129 | 76  | 101  | 174 | 84   |
|      | No 56 | 0 | 24 | 0 | 0 | 1 | 1 | 0 | 118 | 89  | 72.5 | 155 | 59.7 |
|      | No 57 | 1 | 28 | 0 | 0 | 0 | 0 | 0 | 182 | 90  | 103  | 165 | 60   |
|      | No 58 | 1 | 28 | 0 | 1 | 0 | 1 | 0 | 142 | 105 | 100  | 167 | 58.8 |
|      | No 59 | 1 | 26 | 0 | 1 | 0 | 1 | 0 | 136 | 72  | 139  | 169 | 76   |
|      | No 60 | 1 | 25 | 0 | 0 | 1 | 1 | 0 | 151 | 91  | 139  | 166 | 72   |
| Lean | No 1  | 0 | 34 | 0 | 0 | 0 | 0 | 0 | 109 | 79  | 65.5 | 163 |      |
|      | No 2  | 0 | 31 | 0 | 0 | 0 | 0 | 0 | 119 | 80  | 75.6 | 182 |      |

|       |   |    |   |   |   |   |   |     |    |      |     |
|-------|---|----|---|---|---|---|---|-----|----|------|-----|
| No 3  | 1 | 36 | 0 | 0 | 0 | 0 | 0 | 125 | 74 | 70   | 172 |
| No 4  | 0 | 34 | 0 | 0 | 0 | 0 | 0 | 128 | 74 | 59   | 164 |
| No 5  | 0 | 40 | 0 | 0 | 0 | 0 | 0 | 143 | 79 | 60   | 161 |
| No 6  | 0 | 36 | 0 | 0 | 0 | 0 | 0 | 110 | 70 | 74   | 182 |
| No 7  | 0 | 45 | 1 | 0 | 1 | 0 | 0 | 142 | 95 | 84   | 188 |
| No 8  | 0 | 24 | 0 | 0 | 0 | 0 | 0 | 110 | 63 | 64.5 | 178 |
| No 9  | 0 | 35 | 0 | 0 | 0 | 0 | 0 | 121 | 73 | 73   | 178 |
| No 10 | 1 | 31 | 0 | 0 | 0 | 0 | 0 | 121 | 80 | 73   | 175 |
| No 11 | 0 | 33 | 0 | 0 | 0 | 0 | 0 | 106 | 74 | 62   | 160 |
| No 12 | 0 | 34 | 0 | 0 | 0 | 0 | 0 | 108 | 70 | 76.5 | 184 |
| No 13 | 0 | 29 | 0 | 0 | 0 | 0 | 0 | 105 | 78 | 69   | 169 |
| No 14 | 1 | 26 | 0 | 0 | 0 | 0 | 0 | 121 | 78 | 69.5 | 174 |
| No 15 | 1 | 30 | 0 | 0 | 0 | 0 | 0 | 125 | 82 | 71   | 172 |
| No 16 | 1 | 41 | 0 | 0 | 1 | 0 | 0 | 129 | 92 | 68   | 175 |
| No 17 | 1 | 38 | 0 | 0 | 0 | 0 | 0 | 127 | 78 | 64   | 170 |
| No 18 | 0 | 33 | 0 | 0 | 0 | 0 | 0 | 118 | 80 | 71   | 169 |
| No 19 | 0 | 26 | 0 | 0 | 0 | 0 | 0 | 117 | 80 | 73.5 | 180 |
| No 20 | 0 | 36 | 0 | 0 | 0 | 0 | 0 | 113 | 84 | 52   | 159 |
| No 21 | 0 | 37 | 0 | 0 | 0 | 0 | 0 | 124 | 83 | 67.3 | 177 |
| No 22 | 1 | 25 | 0 | 0 | 0 | 0 | 0 | 118 | 80 | 83   | 186 |
| No 23 | 0 | 31 | 0 | 0 | 0 | 0 | 0 | 131 | 84 | 64   | 167 |
| No 24 | 1 | 31 | 0 | 0 | 0 | 0 | 0 | 102 | 63 | 52.5 | 162 |
| No 25 | 0 | 33 | 0 | 0 | 0 | 0 | 0 | 119 | 70 | 79   | 184 |
| No 26 | 0 | 44 | 1 | 0 | 1 | 0 | 0 | 126 | 82 | 63   | 163 |

|       |   |    |   |   |   |   |   |     |    |      |     |
|-------|---|----|---|---|---|---|---|-----|----|------|-----|
| No 27 | 0 | 29 | 0 | 0 | 0 | 0 | 0 | 116 | 63 | 73   | 183 |
| No 28 | 0 | 42 | 0 | 0 | 0 | 0 | 0 | 105 | 85 | 61   | 157 |
| No 29 | 1 | 34 | 0 | 0 | 0 | 0 | 0 | 117 | 79 | 59   | 164 |
| No 30 | 0 | 36 | 0 | 0 | 0 | 0 | 0 | 130 | 78 | 69   | 167 |
| No 31 | 1 | 42 | 1 | 1 | 0 | 0 | 0 | 125 | 70 | 73   | 174 |
| No 32 | 0 | 38 | 0 | 0 | 0 | 0 | 0 | 115 | 63 | 62   | 175 |
| No 33 | 1 | 32 | 0 | 0 | 0 | 0 | 0 | 110 | 70 | 59   | 170 |
| No 34 | 1 | 30 | 0 | 0 | 0 | 0 | 0 | 116 | 74 | 58   | 171 |
| No 35 | 1 | 34 | 0 | 0 | 0 | 0 | 0 | 125 | 75 | 70   | 177 |
| No 36 | 1 | 29 | 0 | 0 | 0 | 0 | 0 | 119 | 81 | 65   | 173 |
| No 37 | 0 | 32 | 0 | 0 | 0 | 0 | 0 | 110 | 70 | 66.5 | 170 |
| No 38 | 1 | 32 | 0 | 0 | 0 | 0 | 0 | 115 | 85 | 73   | 174 |
| No 39 | 0 | 31 | 0 | 0 | 0 | 0 | 0 | 110 | 82 | 53   | 165 |
| No 40 | 1 | 27 | 0 | 0 | 0 | 0 | 0 | 118 | 63 | 80   | 180 |

<sup>a</sup> “0” means female and “1” means male.

<sup>b</sup> “0” means no Diabetes and “1” means having Diabetes.

<sup>c</sup> “0” means no Hyperuricemia and “1” means having Hyperuricemia.

<sup>d</sup> “0” means no Hyperlipemia and “1” means having Hyperlipemia.

<sup>e</sup> “0” means no OSAS and “1” means having OSAS.

<sup>f</sup> “0” means no Hyperinsulinemia and “1” means having Hyperinsulinemia.

Table S2 Differential expression of circRNAs between the obese and lean VAT samples using circRNA microarray

| CircRNA_ID       | p values | q values | fold change | Obese 1 | Obese 2 | Obese 3 | Lean 1 | Lean 2 | Lean 3 | hostgene |
|------------------|----------|----------|-------------|---------|---------|---------|--------|--------|--------|----------|
| hsa_circ_0031995 | 0.00000  | 0.00035  | 2.3937      | 5.1742  | 5.1309  | 5.1820  | 3.9189 | 3.9082 | 3.8825 | SAMD4A   |
| hsa_circ_0035019 | 0.00006  | 0.00736  | 9.6676      | 7.2752  | 7.2464  | 6.9933  | 3.7654 | 3.7707 | 4.1424 | CKMT1B   |
| hsa_circ_0004846 | 0.00023  | 0.01847  | 2.2377      | 6.4782  | 6.3192  | 6.2529  | 5.2882 | 5.1038 | 5.1755 | SAMD4A   |

|                  |         |         |        |        |        |        |        |        |        |          |
|------------------|---------|---------|--------|--------|--------|--------|--------|--------|--------|----------|
| hsa_circ_0002612 | 0.00043 | 0.02600 | 2.4985 | 6.4262 | 6.2688 | 6.1165 | 4.9429 | 4.8100 | 5.0976 | SAMD4A   |
| hsa_circ_0002012 | 0.00056 | 0.02732 | 2.0258 | 4.9984 | 4.7935 | 4.7812 | 3.9414 | 3.6973 | 3.8784 | SAMD4A   |
| hsa_circ_0024182 | 0.00118 | 0.03885 | 0.3866 | 1.9604 | 1.5729 | 1.6124 | 3.0065 | 2.9589 | 3.3014 | ACAT1    |
| hsa_circ_0035016 | 0.00130 | 0.03885 | 4.8295 | 3.6524 | 4.3481 | 4.0803 | 1.7391 | 1.4246 | 2.1046 | CKMT1B   |
| hsa_circ_0031990 | 0.00142 | 0.03885 | 2.4310 | 6.1779 | 6.3589 | 6.1107 | 5.1551 | 4.8443 | 4.7873 | SAMD4A   |
| hsa_circ_0031996 | 0.00173 | 0.03885 | 2.3434 | 5.6522 | 5.3668 | 5.7719 | 4.2092 | 4.5074 | 4.4022 | SAMD4A   |
| hsa_circ_0027396 | 0.00181 | 0.03885 | 2.0440 | 3.4891 | 3.5476 | 3.5912 | 2.3914 | 2.4892 | 2.6435 | C12orf66 |
| hsa_circ_0023599 | 0.00185 | 0.03885 | 0.4806 | 6.1459 | 5.9340 | 5.7906 | 7.1671 | 7.0517 | 6.8242 | XRRA1    |
| hsa_circ_0083215 | 0.00191 | 0.03885 | 2.0301 | 7.6295 | 7.7918 | 7.9848 | 6.9429 | 6.7862 | 6.6158 | ESYT2    |
| hsa_circ_0068162 | 0.00249 | 0.03990 | 3.4653 | 3.0658 | 3.7330 | 3.5018 | 1.8598 | 1.3614 | 1.7326 | MCF2L2   |
| hsa_circ_0023595 | 0.00254 | 0.03990 | 0.3860 | 3.9216 | 4.2087 | 3.8286 | 5.2713 | 5.4096 | 5.4209 | XRRA1    |
| hsa_circ_0005187 | 0.00272 | 0.03990 | 2.1125 | 3.6406 | 3.5233 | 3.7603 | 2.4908 | 2.4010 | 2.7778 | ---      |
| hsa_circ_0031993 | 0.00273 | 0.03990 | 2.0457 | 8.7053 | 8.3247 | 8.4303 | 7.4843 | 7.2581 | 7.6239 | SAMD4A   |
| hsa_circ_0055859 | 0.00284 | 0.03990 | 0.3847 | 2.5717 | 2.7941 | 3.1134 | 4.3746 | 4.3131 | 3.9407 | NPAS2    |
| hsa_circ_0087875 | 0.00294 | 0.03990 | 0.4189 | 2.0885 | 1.8995 | 2.3882 | 3.2081 | 3.4156 | 3.5417 | IKBKAP   |
| hsa_circ_0023592 | 0.00327 | 0.04090 | 0.4279 | 4.2041 | 4.3600 | 3.8796 | 5.1117 | 5.5454 | 5.4650 | XRRA1    |
| hsa_circ_0031916 | 0.00352 | 0.04090 | 0.4311 | 3.4776 | 3.3261 | 3.8209 | 4.5986 | 4.9551 | 4.7350 | FRMD6    |
| hsa_circ_0030322 | 0.00353 | 0.04090 | 0.4541 | 2.9066 | 3.2484 | 2.8910 | 3.9105 | 4.3859 | 4.1568 | ATP7B    |
| hsa_circ_0016194 | 0.00397 | 0.04090 | 0.4502 | 3.1719 | 2.6972 | 2.8451 | 3.8605 | 4.3088 | 4.0038 | DSTYK    |
| hsa_circ_0023593 | 0.00417 | 0.04090 | 0.3812 | 3.9036 | 4.1990 | 3.6647 | 5.3253 | 5.4611 | 5.1927 | XRRA1    |
| hsa_circ_0070784 | 0.00434 | 0.04090 | 2.2568 | 5.5749 | 6.0128 | 6.0340 | 4.7304 | 4.5055 | 4.8830 | USP53    |
| hsa_circ_0058251 | 0.00470 | 0.04090 | 0.4172 | 2.7436 | 3.0998 | 2.6462 | 3.9201 | 3.9207 | 4.4145 | USP37    |
| hsa_circ_0070817 | 0.00482 | 0.04090 | 0.4899 | 5.8844 | 5.7485 | 5.5303 | 6.8283 | 6.9279 | 6.4798 | PRDM5    |
| hsa_circ_0002722 | 0.00489 | 0.04090 | 2.0217 | 5.0905 | 4.9613 | 5.0907 | 3.9726 | 4.2305 | 3.8727 | ---      |
| hsa_circ_0028003 | 0.00495 | 0.04090 | 0.4588 | 4.2693 | 4.7101 | 4.7264 | 5.5592 | 5.9055 | 5.6345 | C12orf75 |
| hsa_circ_0076084 | 0.00510 | 0.04090 | 2.0382 | 5.9267 | 5.8949 | 6.1700 | 4.9467 | 4.7365 | 5.2043 | ANKS1A   |
| hsa_circ_0063803 | 0.00519 | 0.04090 | 2.4938 | 5.6402 | 6.2545 | 5.9289 | 4.8783 | 4.6359 | 4.3763 | CELSR1   |
| hsa_circ_0031989 | 0.00520 | 0.04090 | 2.2677 | 6.3203 | 6.3629 | 6.2586 | 4.9589 | 5.0891 | 5.3275 | SAMD4A   |
| hsa_circ_0045518 | 0.00565 | 0.04257 | 2.1225 | 4.4444 | 4.7045 | 4.8380 | 3.5036 | 3.3456 | 3.8590 | ABCA5    |
| hsa_circ_0035024 | 0.00576 | 0.04257 | 8.5228 | 8.9714 | 9.0720 | 8.8145 | 5.7334 | 5.3429 | 6.3413 | CKMT1A   |
| hsa_circ_0044242 | 0.00624 | 0.04334 | 0.2959 | 4.9170 | 4.4838 | 5.3174 | 6.5546 | 6.9692 | 6.5426 | C17orf57 |
| hsa_circ_0084014 | 0.00632 | 0.04334 | 2.1622 | 5.2896 | 5.4019 | 5.7947 | 4.4383 | 4.1106 | 4.6066 | TACC1    |
| hsa_circ_0031915 | 0.00664 | 0.04334 | 0.4138 | 4.0101 | 3.8445 | 4.3661 | 4.9762 | 5.5565 | 5.4899 | FRMD6    |



|                  |         |         |        |         |         |         |        |        |        |          |
|------------------|---------|---------|--------|---------|---------|---------|--------|--------|--------|----------|
| hsa_circ_0021316 | 0.00672 | 0.04334 | 0.2430 | 2.2101  | 2.8353  | 3.1770  | 4.8619 | 5.2196 | 4.2692 | ARNTL    |
| hsa_circ_0056117 | 0.00698 | 0.04334 | 2.0531 | 5.3466  | 5.3404  | 5.0304  | 4.1168 | 3.9727 | 4.4867 | MERTK    |
| hsa_circ_0055864 | 0.00705 | 0.04334 | 0.2861 | 2.8427  | 2.3753  | 3.2521  | 4.6444 | 5.0538 | 4.1922 | NPAS2    |
| hsa_circ_0011062 | 0.00710 | 0.04334 | 2.2084 | 7.9048  | 8.0893  | 7.6207  | 7.0446 | 6.4649 | 6.6525 | MAP3K6   |
| hsa_circ_0024056 | 0.00749 | 0.04460 | 2.1176 | 3.5481  | 3.6418  | 4.0746  | 2.9041 | 2.4769 | 2.6605 | CWC15    |
| hsa_circ_0062282 | 0.00771 | 0.04477 | 2.2643 | 3.5790  | 3.7214  | 3.3175  | 2.3846 | 2.4051 | 2.3182 | ARVCF    |
| hsa_circ_0056121 | 0.00821 | 0.04551 | 2.0903 | 6.2065  | 6.7026  | 6.2723  | 5.5210 | 5.2724 | 5.2314 | MERTK    |
| hsa_circ_0088147 | 0.00838 | 0.04551 | 0.4067 | 2.4777  | 2.8829  | 2.4075  | 3.9691 | 3.9130 | 3.8232 | RGS3     |
| hsa_circ_0069162 | 0.00860 | 0.04551 | 3.7628 | 5.8656  | 6.8328  | 6.6087  | 4.2172 | 4.3166 | 5.0530 | SH3TC1   |
| hsa_circ_0055866 | 0.00861 | 0.04551 | 0.3640 | 3.4351  | 3.3863  | 3.4607  | 5.0526 | 4.9751 | 4.5872 | NPAS2    |
| hsa_circ_0003980 | 0.00941 | 0.04551 | 0.3066 | 2.1616  | 1.9429  | 1.7643  | 3.7736 | 3.9616 | 3.1620 | NPAS2    |
| hsa_circ_0052127 | 0.00944 | 0.04551 | 2.1797 | 3.5590  | 3.8573  | 3.8774  | 2.3446 | 2.9515 | 2.5812 | NLRP12   |
| hsa_circ_0044007 | 0.00996 | 0.04551 | 2.5799 | 3.7624  | 3.4393  | 4.1577  | 2.0933 | 2.3419 | 2.8167 | MPP3     |
| hsa_circ_0032588 | 0.01031 | 0.04551 | 2.1997 | 4.9041  | 4.4904  | 4.4089  | 3.4759 | 3.3784 | 3.5803 | LTBP2    |
| hsa_circ_0001172 | 0.01079 | 0.04551 | 0.4860 | 2.8257  | 2.7093  | 2.6272  | 4.0295 | 3.5435 | 3.6739 | PPP4R1L  |
| hsa_circ_0028004 | 0.01087 | 0.04551 | 0.4252 | 6.3246  | 6.9853  | 6.8055  | 7.7062 | 8.3167 | 7.7934 | C12orf75 |
| hsa_circ_0002579 | 0.01098 | 0.04551 | 2.0111 | 6.5963  | 7.1622  | 6.9579  | 5.9846 | 5.6125 | 6.1065 | LDLR     |
| hsa_circ_0026556 | 0.01110 | 0.04551 | 0.3443 | 1.9543  | 1.2099  | 1.7031  | 2.7125 | 3.5967 | 3.1341 | SOAT2    |
| hsa_circ_0008132 | 0.01111 | 0.04551 | 0.3048 | 1.7449  | 1.1765  | 2.0812  | 3.1913 | 3.0144 | 3.9150 | PRELID2  |
| hsa_circ_0018643 | 0.01159 | 0.04551 | 2.3612 | 10.2279 | 10.5703 | 10.9560 | 9.3872 | 9.0450 | 9.6354 | PPA1     |
| hsa_circ_0078452 | 0.01171 | 0.04551 | 2.0396 | 3.4764  | 3.4436  | 3.9191  | 2.4983 | 2.5723 | 2.7249 | SYNJ2    |
| hsa_circ_0072525 | 0.01180 | 0.04551 | 0.4626 | 2.2082  | 2.2224  | 2.0153  | 3.3772 | 2.9227 | 3.4388 | MAP3K1   |
| hsa_circ_0057361 | 0.01189 | 0.04551 | 0.4523 | 8.2121  | 7.5951  | 7.6268  | 8.8477 | 9.2743 | 8.7823 | COL3A1   |
| hsa_circ_0007443 | 0.01212 | 0.04551 | 0.4196 | 6.2983  | 5.8354  | 5.5622  | 6.9570 | 7.5366 | 6.9810 | RUNX1T1  |
| hsa_circ_0042349 | 0.01219 | 0.04551 | 0.4249 | 2.2027  | 2.1747  | 1.6868  | 2.8233 | 3.5140 | 3.3968 | TRIM16L  |
| hsa_circ_0084879 | 0.01222 | 0.04551 | 0.4430 | 6.3533  | 5.7512  | 5.7341  | 6.9331 | 7.4771 | 6.9763 | RUNX1T1  |
| hsa_circ_0055867 | 0.01235 | 0.04551 | 0.3764 | 2.5531  | 2.9719  | 2.1042  | 4.1009 | 4.2202 | 3.5924 | NPAS2    |
| hsa_circ_0018647 | 0.01239 | 0.04551 | 2.2435 | 10.1635 | 10.3076 | 10.8166 | 9.2751 | 8.9598 | 9.5746 | PPA1     |
| hsa_circ_0057351 | 0.01278 | 0.04551 | 0.4569 | 6.7638  | 6.4091  | 6.3543  | 7.2574 | 7.9281 | 7.6887 | COL3A1   |
| hsa_circ_0026442 | 0.01317 | 0.04551 | 5.3309 | 5.4959  | 4.6365  | 4.8290  | 2.4663 | 1.7500 | 3.2590 | KRT5     |
| hsa_circ_0031913 | 0.01332 | 0.04551 | 0.4088 | 5.0676  | 5.0576  | 5.7561  | 6.2076 | 6.7834 | 6.8032 | FRMD6    |
| hsa_circ_0085781 | 0.01346 | 0.04551 | 2.1506 | 5.5958  | 5.4904  | 5.6262  | 4.4405 | 4.1909 | 4.7214 | DENND3   |
| hsa_circ_0025013 | 0.01353 | 0.04551 | 0.4558 | 4.8127  | 4.1958  | 4.1897  | 5.5579 | 5.7843 | 5.3100 | DCP1B    |

|                  |         |         |        |         |         |         |         |         |         |                   |
|------------------|---------|---------|--------|---------|---------|---------|---------|---------|---------|-------------------|
| hsa_circ_0069157 | 0.01364 | 0.04551 | 2.1901 | 4.1817  | 4.4422  | 4.4187  | 2.8265  | 3.3750  | 3.3937  | SH3TC1            |
| hsa_circ_0050060 | 0.01386 | 0.04551 | 2.1260 | 5.4684  | 4.9933  | 5.3032  | 4.5292  | 4.0799  | 3.8459  | ARRDC2            |
| hsa_circ_0023991 | 0.01396 | 0.04551 | 0.3025 | 4.4892  | 4.9828  | 4.7544  | 6.4724  | 6.8956  | 5.9100  | NAALAD2           |
| hsa_circ_0007973 | 0.01409 | 0.04551 | 3.1412 | 5.8398  | 5.7880  | 6.6894  | 4.8623  | 4.2613  | 4.3514  | SMAP2             |
| hsa_circ_0002896 | 0.01412 | 0.04551 | 0.4252 | 2.6286  | 2.9160  | 2.4100  | 4.1157  | 4.0627  | 3.4265  | ---               |
| hsa_circ_0013802 | 0.01417 | 0.04551 | 0.3762 | 3.7183  | 3.0875  | 3.7732  | 4.5848  | 5.4108  | 4.7755  | TCONS_12_00002625 |
| hsa_circ_0076154 | 0.01421 | 0.04551 | 8.7650 | 4.4638  | 6.1513  | 4.5844  | 2.9784  | 1.3776  | 1.5280  | FKBP5             |
| hsa_circ_0074097 | 0.01449 | 0.04551 | 2.1693 | 4.4820  | 4.2828  | 4.8643  | 3.5380  | 3.0188  | 3.6983  | GFRA3             |
| hsa_circ_0044236 | 0.01457 | 0.04551 | 2.8473 | 3.4715  | 4.1517  | 4.2606  | 2.9457  | 2.3566  | 2.0159  | MYL4              |
| hsa_circ_0026806 | 0.01487 | 0.04551 | 0.2526 | 11.7001 | 11.5997 | 11.7353 | 13.4007 | 14.1238 | 13.3285 | RPS26             |
| hsa_circ_0056119 | 0.01515 | 0.04551 | 2.4567 | 6.0619  | 6.5795  | 6.0761  | 5.0072  | 4.9069  | 4.9739  | MERTK             |
| hsa_circ_0090323 | 0.01519 | 0.04551 | 0.4901 | 4.4196  | 4.7622  | 4.1265  | 5.5573  | 5.5926  | 5.2978  | KDM6A             |
| hsa_circ_0018333 | 0.01567 | 0.04551 | 2.4590 | 4.4702  | 5.2774  | 4.9894  | 3.7974  | 3.8696  | 3.1991  | ERCC6             |
| hsa_circ_0018645 | 0.01603 | 0.04551 | 2.2221 | 10.1577 | 10.2705 | 10.8556 | 9.3166  | 8.9939  | 9.5629  | PPA1              |
| hsa_circ_0056124 | 0.01623 | 0.04551 | 2.0560 | 4.9817  | 5.5873  | 5.2016  | 4.0953  | 4.3693  | 4.2395  | MERTK             |
| hsa_circ_0057733 | 0.01669 | 0.04551 | 0.4083 | 2.3348  | 3.0648  | 3.0604  | 3.9267  | 4.3689  | 4.1221  | ORC2              |
| hsa_circ_0009010 | 0.01680 | 0.04551 | 0.4563 | 5.8007  | 5.4797  | 5.5096  | 7.0871  | 6.3965  | 6.6381  | PRH1-PRR4         |
| hsa_circ_0049920 | 0.01705 | 0.04551 | 2.0595 | 4.4166  | 4.5011  | 4.4471  | 3.1792  | 3.6813  | 3.3318  | MYO9B             |
| hsa_circ_0018648 | 0.01724 | 0.04551 | 2.4915 | 10.7220 | 10.6593 | 11.4446 | 10.0074 | 9.5993  | 9.3237  | PPA1              |
| hsa_circ_0007913 | 0.01728 | 0.04551 | 0.4372 | 3.4187  | 3.3883  | 2.8469  | 4.3720  | 4.3953  | 4.5304  | WLS               |
| hsa_circ_0006488 | 0.01794 | 0.04551 | 0.4528 | 4.9818  | 5.1659  | 4.7523  | 6.4776  | 5.7377  | 6.0474  | TAS2R30           |
| hsa_circ_0003301 | 0.01818 | 0.04551 | 2.9079 | 3.1521  | 3.5451  | 4.1791  | 1.9401  | 2.5313  | 1.8806  | SAMD4A            |
| hsa_circ_0029267 | 0.01837 | 0.04551 | 0.4630 | 3.9734  | 4.2328  | 3.5633  | 4.6144  | 5.1821  | 5.2952  | TCTN2             |
| hsa_circ_0064888 | 0.01840 | 0.04551 | 0.4709 | 4.3258  | 4.3733  | 3.7997  | 5.4176  | 5.4912  | 4.8304  | EXOGEN            |
| hsa_circ_0018581 | 0.01841 | 0.04551 | 2.7507 | 3.2223  | 3.8263  | 4.1939  | 1.8827  | 2.7031  | 2.3230  | DDX21             |
| hsa_circ_0025461 | 0.01858 | 0.04551 | 0.4561 | 7.2795  | 6.6355  | 6.5602  | 8.2540  | 7.9008  | 7.7891  | PRH1-PRR4         |
| hsa_circ_0018649 | 0.01859 | 0.04551 | 2.1739 | 10.4524 | 10.4737 | 11.0818 | 9.7335  | 9.3827  | 9.6015  | PPA1              |
| hsa_circ_0082718 | 0.01876 | 0.04551 | 0.4869 | 3.7795  | 3.3607  | 3.0577  | 4.6757  | 4.4612  | 4.2340  | DENND2A           |
| hsa_circ_0018651 | 0.01903 | 0.04551 | 2.1656 | 10.3667 | 10.5324 | 11.0916 | 9.6208  | 9.2251  | 9.8384  | PPA1              |
| hsa_circ_0081898 | 0.01917 | 0.04551 | 0.4948 | 4.7930  | 4.1241  | 4.5935  | 5.1924  | 5.8069  | 5.5706  | DUS4L             |
| hsa_circ_0090608 | 0.01931 | 0.04551 | 2.2668 | 3.4640  | 3.7491  | 3.2811  | 2.1403  | 2.7566  | 1.9712  | TSPYL2            |
| hsa_circ_0018640 | 0.01931 | 0.04551 | 2.4188 | 11.0070 | 10.8541 | 11.6748 | 10.2587 | 9.8196  | 9.7126  | PPA1              |
| hsa_circ_0018639 | 0.01965 | 0.04551 | 2.3662 | 11.3479 | 11.1884 | 11.9771 | 10.3437 | 10.0331 | 10.4963 | PPA1              |

|                  |         |         |        |         |         |         |         |         |         |                   |
|------------------|---------|---------|--------|---------|---------|---------|---------|---------|---------|-------------------|
| hsa_circ_0013391 | 0.01967 | 0.04551 | 0.2715 | 1.0508  | 1.7270  | 2.0379  | 3.6187  | 3.5488  | 3.4538  | GPSM2             |
| hsa_circ_0012878 | 0.01982 | 0.04551 | 0.4657 | 3.2870  | 2.8956  | 2.5891  | 4.3100  | 4.1539  | 3.6110  | TCONS_I2_00002523 |
| hsa_circ_0018644 | 0.01985 | 0.04551 | 2.4379 | 10.7827 | 10.6065 | 11.4438 | 10.0574 | 9.6456  | 9.3180  | PPA1              |
| hsa_circ_0026450 | 0.02053 | 0.04551 | 3.5611 | 5.6039  | 4.8483  | 4.8920  | 2.7079  | 2.9570  | 3.9806  | KRT5              |
| hsa_circ_0018638 | 0.02119 | 0.04551 | 2.2725 | 12.1876 | 12.1306 | 12.8410 | 11.4215 | 11.0336 | 11.2381 | PPA1              |
| hsa_circ_0076151 | 0.02152 | 0.04551 | 7.9177 | 7.5620  | 9.4441  | 7.9702  | 6.2971  | 4.3360  | 5.4815  | FKBP5             |
| hsa_circ_0048170 | 0.02162 | 0.04551 | 3.0707 | 2.8634  | 3.1594  | 3.3330  | 2.0560  | 1.2850  | 0.9753  | POLR2E            |
| hsa_circ_0055862 | 0.02171 | 0.04551 | 0.3812 | 3.1898  | 3.8361  | 2.9512  | 4.9770  | 5.0084  | 4.1702  | NPAS2             |
| hsa_circ_0049400 | 0.02177 | 0.04551 | 2.8501 | 6.5037  | 7.5142  | 7.2266  | 5.1841  | 5.4097  | 6.1224  | LDLR              |
| hsa_circ_0018646 | 0.02187 | 0.04551 | 2.7487 | 4.3206  | 4.0787  | 4.9309  | 2.9605  | 3.1907  | 2.9259  | PPA1              |
| hsa_circ_0055861 | 0.02194 | 0.04551 | 0.3847 | 1.5600  | 2.4639  | 2.4370  | 3.7031  | 3.8123  | 3.1723  | NPAS2             |
| hsa_circ_0091204 | 0.02197 | 0.04551 | 0.4868 | 2.9563  | 2.2060  | 2.5356  | 3.4187  | 3.8237  | 3.6418  | KLHL4             |
| hsa_circ_0070769 | 0.02204 | 0.04551 | 2.0616 | 7.8898  | 8.5475  | 8.3283  | 7.3591  | 6.7881  | 7.4737  | USP53             |
| hsa_circ_0092261 | 0.02221 | 0.04551 | 2.0410 | 8.3319  | 8.0888  | 8.7620  | 7.1172  | 7.1991  | 7.7696  | DDX3Y             |
| hsa_circ_0074393 | 0.02250 | 0.04551 | 2.7274 | 3.3548  | 3.1668  | 3.1810  | 1.9824  | 2.0169  | 1.2451  | SH3RF2            |
| hsa_circ_0026807 | 0.02263 | 0.04551 | 0.2875 | 10.6396 | 10.4167 | 10.4640 | 12.0581 | 12.8214 | 11.8584 | RPS26             |
| hsa_circ_0007481 | 0.02264 | 0.04551 | 0.4253 | 6.6038  | 6.0264  | 5.8192  | 7.5826  | 7.3527  | 7.3182  | PRH1-PRR4         |
| hsa_circ_0018652 | 0.02293 | 0.04551 | 2.3846 | 10.4487 | 10.3217 | 11.1656 | 9.7729  | 9.3878  | 9.0807  | PPA1              |
| hsa_circ_0031904 | 0.02301 | 0.04551 | 0.4009 | 5.4262  | 4.9603  | 5.7842  | 6.1615  | 6.9014  | 7.0363  | FRMD6             |
| hsa_circ_0020560 | 0.02330 | 0.04551 | 2.6610 | 3.1201  | 3.0306  | 3.9453  | 1.9529  | 1.7199  | 2.3110  | ADAM8             |
| hsa_circ_0070785 | 0.02384 | 0.04551 | 2.2712 | 6.7336  | 7.5207  | 7.3972  | 6.0796  | 5.6351  | 6.4026  | USP53             |
| hsa_circ_0005681 | 0.02392 | 0.04551 | 2.2094 | 5.1348  | 4.4519  | 5.2209  | 4.1083  | 3.7632  | 3.5684  | MEN1              |
| hsa_circ_0016697 | 0.02409 | 0.04551 | 2.2326 | 5.2204  | 5.9932  | 5.6995  | 4.2426  | 4.2203  | 4.9512  | C1orf55           |
| hsa_circ_0018642 | 0.02416 | 0.04551 | 2.2112 | 10.3076 | 10.4098 | 11.0597 | 9.6745  | 9.2446  | 9.5116  | PPA1              |
| hsa_circ_0056554 | 0.02423 | 0.04551 | 0.4873 | 2.9097  | 2.6663  | 2.2719  | 3.6720  | 3.5993  | 3.7540  | ZRANB3            |
| hsa_circ_0049398 | 0.02443 | 0.04551 | 3.6733 | 4.7015  | 5.9331  | 5.4928  | 2.8038  | 3.4377  | 4.1824  | LDLR              |
| hsa_circ_0013803 | 0.02448 | 0.04551 | 0.2921 | 4.0725  | 2.6871  | 3.4449  | 4.8186  | 5.7543  | 5.1189  | TCONS_I2_00002625 |
| hsa_circ_0056118 | 0.02466 | 0.04551 | 2.4749 | 5.0756  | 5.9413  | 5.3264  | 4.3170  | 3.9579  | 4.2626  | MERTK             |
| hsa_circ_0021577 | 0.02491 | 0.04551 | 0.4902 | 4.6506  | 4.0684  | 4.8221  | 5.5818  | 5.7853  | 5.3259  | QSER1             |
| hsa_circ_0026455 | 0.02502 | 0.04551 | 4.8439 | 5.6832  | 4.7236  | 5.0883  | 2.5780  | 1.9593  | 3.7253  | KRT5              |
| hsa_circ_0057362 | 0.02511 | 0.04551 | 0.3426 | 7.7361  | 6.5259  | 7.0469  | 8.5583  | 9.1257  | 8.4163  | COL3A1            |
| hsa_circ_0026413 | 0.02515 | 0.04551 | 4.0030 | 4.0122  | 3.5051  | 3.3749  | 2.2141  | 0.7329  | 1.6585  | KRT6C             |
| hsa_circ_0074362 | 0.02518 | 0.04551 | 2.1265 | 5.4297  | 6.1987  | 6.0443  | 5.1349  | 4.4791  | 4.8282  | ARHGAP26          |

|                  |         |         |        |         |         |         |         |         |         |          |
|------------------|---------|---------|--------|---------|---------|---------|---------|---------|---------|----------|
| hsa_circ_0019498 | 0.02583 | 0.04596 | 2.2738 | 3.7325  | 3.7762  | 3.8033  | 2.2015  | 2.5671  | 2.9040  | CHUK     |
| hsa_circ_0086312 | 0.02600 | 0.04596 | 2.1693 | 3.3200  | 2.9953  | 3.0257  | 1.9765  | 2.3716  | 1.5475  | GLDC     |
| hsa_circ_0004394 | 0.02614 | 0.04596 | 0.4076 | 5.5495  | 4.5988  | 4.9332  | 6.3238  | 6.5954  | 6.1798  | RUNX1T1  |
| hsa_circ_0089758 | 0.02619 | 0.04596 | 2.0013 | 2.7647  | 3.2813  | 3.5106  | 2.2261  | 1.9210  | 2.4550  | CACNA1B  |
| hsa_circ_0044243 | 0.02637 | 0.04596 | 0.4327 | 4.7397  | 4.2363  | 5.1459  | 5.7113  | 6.0807  | 6.0671  | C17orf57 |
| hsa_circ_0018641 | 0.02658 | 0.04599 | 2.2856 | 10.6939 | 10.5939 | 11.4000 | 10.1220 | 9.6975  | 9.3189  | PPA1     |
| hsa_circ_0031912 | 0.02801 | 0.04731 | 0.4197 | 5.4359  | 5.0054  | 5.9558  | 6.2406  | 7.0867  | 6.8586  | FRMD6    |
| hsa_circ_0031905 | 0.02807 | 0.04731 | 0.4528 | 6.2949  | 6.2059  | 6.9246  | 7.1211  | 7.7991  | 7.9235  | FRMD6    |
| hsa_circ_0045854 | 0.02829 | 0.04731 | 2.0475 | 7.2736  | 7.1225  | 7.7639  | 6.3661  | 5.9212  | 6.7374  | SEC14L1  |
| hsa_circ_0042077 | 0.02848 | 0.04731 | 0.2369 | 1.9957  | 0.5483  | 1.6734  | 3.4439  | 3.4466  | 3.8759  | GLP2R    |
| hsa_circ_0079215 | 0.02860 | 0.04731 | 0.4387 | 3.5488  | 4.4878  | 4.0661  | 5.1468  | 5.5264  | 5.1082  | SDK1     |
| hsa_circ_0004452 | 0.02878 | 0.04731 | 2.0150 | 6.7797  | 7.1911  | 7.4018  | 5.7825  | 5.9474  | 6.5580  | ---      |
| hsa_circ_0078335 | 0.02888 | 0.04731 | 2.1865 | 4.3097  | 4.4200  | 5.1187  | 3.4161  | 3.8215  | 3.3130  | IPCEF1   |
| hsa_circ_0004432 | 0.02894 | 0.04731 | 2.1341 | 4.9993  | 5.4483  | 5.8601  | 4.6885  | 4.3228  | 4.0761  | MYO1E    |
| hsa_circ_0057354 | 0.02997 | 0.04731 | 0.4967 | 7.0294  | 6.8241  | 6.8417  | 7.4812  | 8.1190  | 8.0518  | COL3A1   |
| hsa_circ_0018454 | 0.03021 | 0.04731 | 2.0950 | 3.7709  | 4.4119  | 4.3749  | 3.3754  | 2.6133  | 3.3339  | ARID5B   |
| hsa_circ_0002697 | 0.03023 | 0.04731 | 2.0548 | 8.0932  | 7.3684  | 8.0018  | 6.5856  | 6.5415  | 7.2179  | MTHFD1L  |
| hsa_circ_0034055 | 0.03041 | 0.04731 | 0.4993 | 3.1489  | 3.2083  | 2.8473  | 3.6045  | 4.3175  | 4.2163  | TUBGCP5  |
| hsa_circ_0075466 | 0.03079 | 0.04731 | 2.0365 | 5.0162  | 5.2142  | 5.7941  | 4.5566  | 3.9358  | 4.4938  | SERPINB9 |
| hsa_circ_0044241 | 0.03109 | 0.04731 | 0.3793 | 4.2810  | 3.6657  | 4.8136  | 5.3985  | 5.9267  | 5.8032  | C17orf57 |
| hsa_circ_0004895 | 0.03126 | 0.04731 | 2.1540 | 5.8573  | 6.2002  | 6.7412  | 5.4742  | 5.2002  | 4.8824  | SYNC     |
| hsa_circ_0019453 | 0.03132 | 0.04731 | 2.1118 | 4.3596  | 4.5864  | 4.4168  | 3.6921  | 3.4265  | 2.9136  | ABCC2    |
| hsa_circ_0057355 | 0.03133 | 0.04731 | 0.4831 | 6.8448  | 6.6615  | 6.5420  | 7.2605  | 7.9669  | 7.8879  | COL3A1   |
| hsa_circ_0018650 | 0.03136 | 0.04731 | 2.2956 | 11.3330 | 11.3000 | 12.0984 | 10.6508 | 10.2873 | 10.3163 | PPA1     |
| hsa_circ_0013694 | 0.03145 | 0.04731 | 2.2308 | 4.3253  | 5.1797  | 4.5893  | 3.7981  | 3.5054  | 3.4273  | ATP1A1   |
| hsa_circ_0070762 | 0.03174 | 0.04731 | 2.1102 | 11.8763 | 12.5032 | 12.3326 | 11.1994 | 10.6530 | 11.5580 | USP53    |
| hsa_circ_0069158 | 0.03183 | 0.04731 | 2.1756 | 4.3064  | 4.7659  | 4.7677  | 2.9150  | 3.7571  | 3.7067  | SH3TC1   |
| hsa_circ_0005044 | 0.03186 | 0.04731 | 0.3791 | 2.5458  | 2.7280  | 3.0749  | 4.0399  | 4.7107  | 3.6411  | PRR5L    |
| hsa_circ_0009176 | 0.03187 | 0.04731 | 2.3618 | 7.0490  | 7.3596  | 7.4763  | 5.6333  | 5.8024  | 6.5784  | ELL2     |
| hsa_circ_0085785 | 0.03216 | 0.04731 | 2.0726 | 5.0472  | 4.5998  | 5.4524  | 4.0636  | 3.7156  | 4.2418  | DENND3   |
| hsa_circ_0061270 | 0.03272 | 0.04731 | 3.6346 | 6.7851  | 6.1331  | 7.3713  | 4.8505  | 4.9682  | 5.1315  | SAMSN1   |
| hsa_circ_0074365 | 0.03294 | 0.04731 | 2.0476 | 7.7780  | 8.5658  | 8.1004  | 7.2990  | 6.9612  | 7.1719  | ARHGAP26 |
| hsa_circ_0031910 | 0.03294 | 0.04731 | 0.4724 | 4.4862  | 4.2562  | 5.0652  | 5.2138  | 5.8709  | 5.9801  | FRMD6    |

|                  |         |         |        |        |        |        |        |        |        |          |
|------------------|---------|---------|--------|--------|--------|--------|--------|--------|--------|----------|
| hsa_circ_0074150 | 0.03304 | 0.04731 | 2.0440 | 4.1976 | 3.8286 | 3.8940 | 2.6314 | 2.6902 | 3.3992 | HSPA9    |
| hsa_circ_0052828 | 0.03318 | 0.04731 | 0.2749 | 4.8628 | 4.3549 | 4.5846 | 6.7620 | 6.7909 | 5.5942 | SDC1     |
| hsa_circ_0045856 | 0.03378 | 0.04731 | 2.0378 | 7.4373 | 7.2353 | 7.7254 | 6.5422 | 5.9179 | 6.7708 | SEC14L1  |
| hsa_circ_0074368 | 0.03398 | 0.04731 | 2.0285 | 4.9920 | 5.2990 | 5.1463 | 4.0706 | 3.6947 | 4.5113 | ARHGAP26 |
| hsa_circ_0072555 | 0.03405 | 0.04731 | 0.4663 | 5.8056 | 5.6777 | 6.2768 | 6.7283 | 6.7327 | 7.5208 | PLK2     |
| hsa_circ_0055135 | 0.03423 | 0.04731 | 0.4822 | 3.0773 | 2.8895 | 3.7037 | 4.3421 | 4.4610 | 4.1366 | ANKRD53  |
| hsa_circ_0029168 | 0.03426 | 0.04731 | 2.2014 | 3.4743 | 4.0455 | 4.2756 | 2.4406 | 2.5713 | 3.3184 | PITPNM2  |
| hsa_circ_0001600 | 0.03450 | 0.04731 | 9.1125 | 8.3844 | 9.3933 | 8.0159 | 4.1707 | 4.0841 | 6.6991 | FKBP5    |
| hsa_circ_0009082 | 0.03450 | 0.04731 | 0.1398 | 1.4312 | 3.0270 | 1.0026 | 3.3619 | 5.2175 | 5.4733 | ADAMTS16 |
| hsa_circ_0067996 | 0.03452 | 0.04731 | 2.4963 | 5.5904 | 5.6757 | 6.5277 | 4.9045 | 4.4215 | 4.6644 | FNDC3B   |
| hsa_circ_0042731 | 0.03487 | 0.04731 | 0.3423 | 1.7505 | 0.7735 | 2.0266 | 2.8053 | 3.3623 | 3.2406 | PHF12    |
| hsa_circ_0084887 | 0.03490 | 0.04731 | 0.4982 | 3.4516 | 3.0045 | 2.6463 | 4.0895 | 4.4026 | 3.6396 | TMEM67   |
| hsa_circ_0016946 | 0.03549 | 0.04741 | 0.4100 | 2.0742 | 2.2558 | 1.2093 | 2.7484 | 3.6061 | 3.1146 | PCNXL2   |
| hsa_circ_0056125 | 0.03594 | 0.04741 | 2.4529 | 4.2224 | 4.2365 | 4.0780 | 2.9771 | 3.2276 | 2.3043 | MERTK    |
| hsa_circ_0077995 | 0.03615 | 0.04741 | 4.7639 | 6.8270 | 7.8987 | 8.4742 | 4.8128 | 4.8189 | 6.5274 | TNFAIP3  |
| hsa_circ_0035018 | 0.03638 | 0.04741 | 2.6659 | 6.8960 | 7.3867 | 6.9612 | 5.1446 | 5.3399 | 6.2912 | CKMT1B   |
| hsa_circ_0055865 | 0.03647 | 0.04741 | 0.3476 | 3.8277 | 2.5467 | 3.2316 | 4.9088 | 4.9772 | 4.5329 | NPAS2    |
| hsa_circ_0008850 | 0.03681 | 0.04741 | 2.3518 | 6.4117 | 7.2368 | 7.2229 | 5.3880 | 5.4279 | 6.3025 | ---      |
| hsa_circ_0075951 | 0.03708 | 0.04741 | 2.8812 | 7.4433 | 7.0311 | 8.2204 | 6.6974 | 5.4854 | 5.9244 | HLA-DQA1 |
| hsa_circ_0072107 | 0.03733 | 0.04741 | 4.5934 | 6.0713 | 4.3545 | 5.8546 | 3.0607 | 2.7164 | 4.0681 | NPR3     |
| hsa_circ_0032352 | 0.03739 | 0.04741 | 2.0339 | 6.8127 | 7.6105 | 7.3802 | 6.0765 | 5.9381 | 6.7068 | KIAA0247 |
| hsa_circ_0091701 | 0.03755 | 0.04741 | 2.4025 | 3.4102 | 3.8067 | 3.0836 | 1.8586 | 2.7805 | 1.7139 | VMA21    |
| hsa_circ_0032139 | 0.03764 | 0.04741 | 2.0471 | 4.4754 | 4.6045 | 5.2688 | 3.7533 | 4.0012 | 3.5953 | HIF1A    |
| hsa_circ_0042076 | 0.03775 | 0.04741 | 0.2902 | 2.5622 | 1.1134 | 1.8451 | 3.5276 | 3.7601 | 3.9167 | GLP2R    |
| hsa_circ_0079949 | 0.03777 | 0.04741 | 0.4453 | 6.7497 | 6.7868 | 6.0435 | 7.8149 | 8.0880 | 7.1339 | GLI3     |
| hsa_circ_0071767 | 0.03790 | 0.04741 | 0.3220 | 2.2244 | 0.7752 | 1.2588 | 2.8013 | 3.1828 | 3.4870 | SRD5A1   |
| hsa_circ_0051717 | 0.03810 | 0.04741 | 0.4316 | 2.8707 | 2.1163 | 1.8221 | 3.3656 | 3.8312 | 3.4125 | LIG1     |
| hsa_circ_0026401 | 0.03823 | 0.04741 | 4.2037 | 5.3375 | 3.8808 | 3.7903 | 2.2544 | 1.8831 | 2.9917 | KRT6B    |
| hsa_circ_0076153 | 0.03850 | 0.04741 | 5.9689 | 7.2449 | 8.9047 | 7.4325 | 6.1924 | 3.9459 | 5.5268 | FKBP5    |
| hsa_circ_0055863 | 0.03856 | 0.04741 | 0.4653 | 3.7872 | 3.7126 | 3.8380 | 5.0666 | 5.0859 | 4.3999 | NPAS2    |
| hsa_circ_0057350 | 0.03866 | 0.04741 | 0.4751 | 6.9195 | 6.8306 | 6.8191 | 7.4725 | 8.1919 | 8.0331 | COL3A1   |
| hsa_circ_0000353 | 0.03895 | 0.04752 | 3.2491 | 6.0080 | 6.5382 | 7.4178 | 4.7945 | 4.8328 | 5.4851 | BIRC3    |
| hsa_circ_0074580 | 0.03953 | 0.04799 | 2.3034 | 3.9751 | 3.6215 | 4.3085 | 2.5313 | 2.2710 | 3.3456 | TNIP1    |

|                  |         |         |        |        |         |        |         |         |         |          |
|------------------|---------|---------|--------|--------|---------|--------|---------|---------|---------|----------|
| hsa_circ_0079950 | 0.03980 | 0.04808 | 0.4570 | 4.8424 | 4.6147  | 3.8626 | 5.8273  | 5.6748  | 5.3346  | GLI3     |
| hsa_circ_0032578 | 0.04011 | 0.04815 | 2.5119 | 5.1257 | 5.2480  | 4.8220 | 4.1746  | 3.0366  | 3.8099  | LTBP2    |
| hsa_circ_0042104 | 0.04059 | 0.04815 | 0.3448 | 1.5411 | 2.9882  | 2.1336 | 4.3140  | 3.6543  | 3.5477  | MYOCD    |
| hsa_circ_0056122 | 0.04072 | 0.04815 | 2.5571 | 5.4568 | 6.3027  | 5.4353 | 4.3751  | 4.3805  | 4.5477  | MERTK    |
| hsa_circ_0069155 | 0.04084 | 0.04815 | 2.1615 | 6.6979 | 5.9866  | 6.5392 | 5.0698  | 4.8673  | 5.8483  | SH3TC1   |
| hsa_circ_0049394 | 0.04093 | 0.04815 | 2.9865 | 5.8760 | 7.2094  | 6.8851 | 4.7981  | 4.8644  | 5.6962  | LDLR     |
| hsa_circ_0053875 | 0.04164 | 0.04815 | 0.4868 | 2.0502 | 2.9268  | 2.6598 | 3.4861  | 3.5945  | 3.7896  | TTC27    |
| hsa_circ_0019978 | 0.04174 | 0.04815 | 2.5573 | 5.1884 | 4.3436  | 5.5087 | 3.5744  | 3.3617  | 4.1546  | ITPRIP   |
| hsa_circ_0069160 | 0.04190 | 0.04815 | 4.0377 | 4.3161 | 4.7634  | 4.8849 | 2.5240  | 1.5568  | 3.3624  | SH3TC1   |
| hsa_circ_0026565 | 0.04196 | 0.04815 | 0.4781 | 4.0022 | 3.8014  | 3.7469 | 4.9184  | 5.2808  | 4.4352  | ZNF740   |
| hsa_circ_0061118 | 0.04200 | 0.04815 | 6.4647 | 2.6912 | 4.7695  | 4.6783 | 1.9657  | 0.5537  | 1.9279  | SLCO4A1  |
| hsa_circ_0000395 | 0.04259 | 0.04815 | 2.0995 | 4.3943 | 4.5474  | 4.1607 | 3.6768  | 3.3591  | 2.7276  | SLC38A1  |
| hsa_circ_0060372 | 0.04261 | 0.04815 | 0.4851 | 2.8454 | 2.0010  | 1.9960 | 3.3305  | 3.1521  | 3.6253  | DHX35    |
| hsa_circ_0044509 | 0.04268 | 0.04815 | 0.3443 | 9.3905 | 10.5676 | 9.1896 | 11.0614 | 11.9039 | 11.0248 | COL1A1   |
| hsa_circ_0035229 | 0.04277 | 0.04815 | 0.4971 | 1.9213 | 2.6224  | 1.7013 | 2.7796  | 3.2005  | 3.3905  | TRPM7    |
| hsa_circ_0046448 | 0.04282 | 0.04815 | 2.2020 | 3.1901 | 3.3491  | 3.3331 | 2.4541  | 1.5844  | 2.2840  | TBCD     |
| hsa_circ_0049386 | 0.04316 | 0.04830 | 3.3568 | 6.5562 | 8.0234  | 7.5921 | 5.1514  | 5.3123  | 6.4553  | LDLR     |
| hsa_circ_0044507 | 0.04358 | 0.04842 | 0.3434 | 9.3231 | 10.4877 | 9.0681 | 11.0121 | 11.7936 | 10.9617 | COL1A1   |
| hsa_circ_0068409 | 0.04375 | 0.04842 | 2.5552 | 4.4063 | 5.2548  | 4.2343 | 3.7006  | 3.5281  | 2.6016  | IGF2BP2  |
| hsa_circ_0005489 | 0.04411 | 0.04842 | 0.4158 | 1.9122 | 1.2225  | 2.3901 | 3.3861  | 2.9149  | 3.2131  | FLCN     |
| hsa_circ_0008474 | 0.04420 | 0.04842 | 0.2196 | 2.7093 | 1.7593  | 1.6523 | 3.0060  | 4.6042  | 4.7634  | ADAMTS16 |
| hsa_circ_0004654 | 0.04426 | 0.04842 | 2.4409 | 3.5165 | 4.1936  | 3.2232 | 3.0086  | 2.0832  | 1.8974  | MOCOS    |
| hsa_circ_0080211 | 0.04470 | 0.04848 | 2.3385 | 3.4520 | 4.4187  | 4.0384 | 2.8990  | 2.8330  | 2.6479  | GRB10    |
| hsa_circ_0019478 | 0.04498 | 0.04848 | 2.0260 | 3.2925 | 3.7592  | 3.6413 | 3.0369  | 2.0780  | 2.3919  | ABCC2    |
| hsa_circ_0044503 | 0.04524 | 0.04848 | 0.3634 | 9.4096 | 10.5349 | 9.1771 | 11.0265 | 11.7384 | 10.9971 | COL1A1   |
| hsa_circ_0008634 | 0.04533 | 0.04848 | 2.1530 | 7.2326 | 6.9830  | 6.7895 | 5.8287  | 5.3308  | 6.3733  | IRAK3    |
| hsa_circ_0049379 | 0.04543 | 0.04848 | 2.2460 | 7.2997 | 8.3370  | 7.8474 | 6.4146  | 6.3917  | 7.2034  | LDLR     |
| hsa_circ_0052833 | 0.04576 | 0.04848 | 0.3671 | 3.9128 | 4.9619  | 4.4568 | 6.2418  | 6.2424  | 5.1036  | SDC1     |
| hsa_circ_0047677 | 0.04590 | 0.04848 | 2.0746 | 5.0771 | 5.0981  | 4.8600 | 4.4004  | 3.8623  | 3.4748  | MYO5B    |
| hsa_circ_0026362 | 0.04618 | 0.04848 | 3.7783 | 6.4217 | 5.6048  | 4.8405 | 3.5599  | 3.7983  | 4.1249  | KRT7     |
| hsa_circ_0061123 | 0.04623 | 0.04848 | 4.4013 | 5.1181 | 6.8603  | 6.6488 | 4.5838  | 3.6004  | 4.3908  | SLCO4A1  |
| hsa_circ_0031261 | 0.04630 | 0.04848 | 0.2738 | 2.5124 | 0.7572  | 1.6982 | 3.9957  | 3.6010  | 3.4308  | AJUBA    |
| hsa_circ_0089830 | 0.04703 | 0.04880 | 2.0505 | 5.0365 | 4.3035  | 5.2056 | 3.5649  | 3.8357  | 4.1311  | PRKX     |

|                  |         |         |        |        |         |        |         |         |         |         |
|------------------|---------|---------|--------|--------|---------|--------|---------|---------|---------|---------|
| hsa_circ_0054693 | 0.04729 | 0.04880 | 2.2285 | 6.0561 | 5.9443  | 6.7618 | 4.5950  | 4.9443  | 5.6789  | REL     |
| hsa_circ_0077996 | 0.04749 | 0.04880 | 3.7992 | 7.0040 | 8.0533  | 8.7614 | 5.9626  | 5.5373  | 6.7698  | TNFAIP3 |
| hsa_circ_0004761 | 0.04757 | 0.04880 | 0.4806 | 3.7100 | 2.9082  | 2.8722 | 4.2468  | 4.1569  | 4.4104  | DENND2A |
| hsa_circ_0026805 | 0.04760 | 0.04880 | 0.2135 | 7.7153 | 7.2360  | 7.6762 | 9.4922  | 10.5435 | 8.7684  | RPS26   |
| hsa_circ_0000143 | 0.04813 | 0.04912 | 2.2362 | 3.5704 | 3.7418  | 4.5515 | 3.0703  | 2.2842  | 3.0893  | CD1D    |
| hsa_circ_0069161 | 0.04835 | 0.04912 | 3.1993 | 3.6074 | 4.0448  | 4.6830 | 1.6579  | 1.9976  | 3.2999  | SH3TC1  |
| hsa_circ_0078342 | 0.04851 | 0.04912 | 5.4654 | 3.1869 | 5.1949  | 4.9724 | 2.1871  | 2.7296  | 1.5488  | IPCEF1  |
| hsa_circ_0049665 | 0.04947 | 0.04973 | 2.1058 | 3.9157 | 4.2580  | 4.2779 | 3.5763  | 2.9459  | 2.5435  | TRMT1   |
| hsa_circ_0044512 | 0.04971 | 0.04973 | 0.3519 | 9.3780 | 10.5618 | 9.0905 | 11.0381 | 11.8410 | 10.9397 | COL1A1  |
| hsa_circ_0049376 | 0.04973 | 0.04973 | 2.7195 | 6.3929 | 7.5975  | 7.3433 | 5.5457  | 5.6506  | 6.0198  | LDLR    |

---

Table S3 Primers and probes used in the study

| Gene             | Sequence                                                       | Product length (bp) |
|------------------|----------------------------------------------------------------|---------------------|
| hsa_circ_0004846 | 5'-CCAGCACAAAGTACAAGAATCATTA-3'<br>3'-AGAGTGAGCCAGGATTTTGGG-5' | 155                 |
| hsa_circ_0031995 | 5'-ACCAGTGGATTCGTCAGCTC-3'<br>3'-AGCTTCTGCACCTGCTGTTT-5'       | 131                 |
| hsa_circ_0035019 | 5'-TATGCTGCAGATAGCCGCTT-3'<br>3'-TATCAAAGACACCCGCCTGTAGC-5'    | 103                 |
| hsa_circ_0002612 | 5'-CTTCAGGAAGTGGTGGGAGT-3'<br>3'-TTCAGCAAAGGCAGATGAGTT-5'      | 160                 |
| hsa_circ_0002012 | 5'-AATAGCATGCCAAGCCGCAC-3'<br>3'-AGGGAGTTGGATTGCCCAA-5'        | 124                 |
| hsa_circ_0024182 | 5'-AGCTTGCTTGTCTGTATGCC-3'<br>3'-AGGAGCCTGTCTCTTGCTTG-5'       | 118                 |
| hsa_circ_0031990 | 5'-GCAGTTCACACGCGTCAT-3'<br>3'-GACATCCATCCATGTCCTAGA-5'        | 126                 |
| hsa_circ_0035016 | 5'-TCTACTTGCTCTGGACCTGC-3'<br>3'-TGCAGTTGTTGTGCTTTCGG-5'       | 107                 |
| hsa_circ_0031996 | 5'-GTGCACACTTCCCCACAGAA-3'<br>3'-GACTGAGCTGTGGGTGCG-5'         | 106                 |
| hsa_circ_0027396 | 5'-GTGAAGGCATAATGGGCTGT-3'<br>3'-TAGATGGTGCGGATGGAATC-5'       | 122                 |
| hsa_circ_0023599 | 5'-GAAGTCACTGAAGGCCAGGA-3'<br>3'-TTGGCATTAATGGTGCACAG-5'       | 132                 |
| hsa_circ_0023595 | 5'-GAGCGACTGGGAATCCACTT-3'<br>3'-TGACTTCACAGGAAGGATCTCG-5'     | 179                 |
| hsa_circ_0055859 | 5'-CTGGGAACCTCAGGCTATGAC-3'<br>3'-CCGACGCTTCTTCTCAGACT-5'      | 104                 |
| hsa_circ_0087875 | 5'-CCTCGCCTATGATTGGCACT-3'<br>3'-CTGAACTCCAGGGTCCGAAAT-5'      | 179                 |
| hsa_circ_0083215 | 5'-TGAAGACCCAGACAAGGATGA-3'<br>3'-CGCACGGCTGGTTCTATAGTT-5'     | 159                 |
| CircANRIL        | 5'-TGACAGTGTCCCTTTTGTAGAGA-3'<br>3'-GGAAAGGATTCCAGCACACCT-5'   | 195                 |
| hWnt1            | 5'-CCGATGGTGGGGTATTGTGA-3'<br>3'-TCCCCGGATTTTGGCGTATC-5'       | 137                 |
| hSAM4A           | 5'-AGAAATCGAGGCTTTGGGCA-3'<br>3'-CCGAGAGGGGATCTGGTACT-5'       | 102                 |
| hCCND3           | 5'-GAGGTGCAATCCTCTCCTCG-3'<br>3'-GCTGCTCCTCACATACCTCC-5'       | 145                 |
| hEZH2            | 5'-ACATCCTTTTCATGCAACACC-3'<br>3'-GCTCCCTCCAAATGCTGGTA-5'      | 105                 |
| hSIRT1           | 5'-GGGCTGCGGTTCCCTACTG-3'<br>3'-AAGGTTATCTGGCTGCTGCG-5'        | 104                 |
| hSOX4            | 5'-GCACTAGGACGTCTGCCTTT-3'<br>3'-ACACGGCATATTGCACAGGA-5'       | 92                  |
| hEID1            | 5'-CCGAAGAACTCGGCTGTGAT-3'<br>3'-AGTTGGGTCCCTCCTCAAGT-5'       | 89                  |
| hWnt10b          | 5'-CTGACAAGGGGACAGAACCC-3'<br>3'-TCAGGACCTCCAGTGGTTTG-5'       | 117                 |
| hPPAR- $\gamma$  | 5'-CGAGAGTCAGCCTTTAACGAAATG-3'<br>3'-AGGAGTGGGAGTGGTCTTCC-5'   | 115                 |
| hCEBP- $\alpha$  | 5'-TATAGGCTGGGCTTCCCCTT-3'<br>3'-AGCTTCTGGTGTGACTCGG-5'        | 94                  |



|                  |                                                                  |     |
|------------------|------------------------------------------------------------------|-----|
| hGAPDH           | 5'- GAAAGCCTGCCGGTACTAA -3'<br>3'- GCCCAATACGACCAAATCAGAG -5'    | 150 |
| mmu_circ_0000529 | 5'- GCAAGCACGAGAATCATTAACCA -3'<br>3'- TTCGATAGAGTGTGCCAGGAT -5' | 156 |
| mSAMMD4          | 5'- GAGCTGCGTGGAGTAGTGAT -3'<br>3'- AAATCCCTCGCAAGGCACAA -5'     | 164 |
| mEZH2            | 5'- TCCATGCAACACCCAACACA -3'<br>3'- CCTTAGCTCCCTCCAGATGC -5'     | 102 |
| mPPAR- $\gamma$  | 5'- CAGGTCAGAGTCGCCCCG -3'<br>3'- CCGGTCACCTTGTTCGTCACA -5'      | 127 |
| mC/EBP- $\alpha$ | 5'- AATGGCAGTGTGCACGTCTA -3'<br>3'- CCCCAGCCGTTAGTGAAGAG -5'     | 109 |
| mGAPDH           | 5'- CCCTTAAGAGGGATGCTGCC -3'<br>3'- TACGGCCAAATCCGTTTACA -5'     | 124 |

---

#### circRIP probes

|             |                                                                |
|-------------|----------------------------------------------------------------|
| circSAMMD4A | 5'- TGTTGCCATTGGTTAATGATTCTTGTACTTGTGCTGGTTCCAAT<br>-3'-biotin |
| Control     | 5'-CTAAGACTAGGTGTTTCGGAGGGAAAACAAAAAGAGATATCAGAA<br>-3'-biotin |

---

#### miRNA probes

|            |                                                |
|------------|------------------------------------------------|
| miR-138-5p | biotin-5'- CGGCCTGATTCAACAACACCAGCT -3'-biotin |
|------------|------------------------------------------------|

---

#### FISH probes

|                  |                                                                            |
|------------------|----------------------------------------------------------------------------|
| circSAMMD4A      | digoxin-5'-<br>CCTGTTGCCATTGGTTAATGATTCTTGTACTTGTGCTGGTTCC<br>-3'-digoxin  |
| Negative Control | 5'-TAAGACTAGGTGTTTCGGAGGGAAAACAAAAAGAGATATCAGAA<br>-3'-biotin              |
| GAPDH            | digoxin-5'-<br>AGGCGCCCAATACGACCAAATCAGAGAATAATCTAGGAAAAGCA<br>-3'-digoxin |

---

#### siRNAs

|             |                               |
|-------------|-------------------------------|
| circSAMMD4A | 5'- AGCACAAGUACAAGAAUCAUU -3' |
| EZH2        | 5'- ACAUACUCUUUACUUCAUCAG -3' |
| EID-1       | 5'- UCUUGUUCUCAGAAACAUCUU -3' |

---

#### ISH probes

|             |                                                  |
|-------------|--------------------------------------------------|
| circSAMMD4A | digoxin-5'- TGGTTAATGATTCTTGTACTTGTG -3'-digoxin |
|-------------|--------------------------------------------------|

Table S4 CircSAMD4A expression in obese sample

| Clinical or molecular feature           | CircSAMD4A(30)  |                 | <i>P</i> |
|-----------------------------------------|-----------------|-----------------|----------|
|                                         | over-expression | down-expression |          |
| Age (y)                                 | 25±3.7          | 31±5.6          | 0.001    |
| Gender (M/F)                            | 7/23            | 7/23            |          |
| BMI (kg/m <sup>2</sup> )                | 40.8±6.56       | 35.5±4.32       | <0.001   |
| Systolic BP (mm Hg)                     | 127.3±11.2      | 132±17.3        | 0.202    |
| Diastolic BP (mm Hg)                    | 77.9±7.77       | 84.8±12.3       | 0.013    |
| Diabetes                                | 11%(3/30)       | 19%(6/30)       | 0.286    |
| Hyperuricemia (HUA)                     | 29%(8/30)       | 13%(4/30)       | 0.203    |
| Hyperlipemia (HLP)                      | 54%(17/30)      | 63%(18/30)      | 0.798    |
| Obstructive sleep apnea syndrome (OSAS) | 75%(22/30)      | 56%(17/30)      | 0.182    |
| Hyperinsulinemia (HINS)                 | 4%(1/30)        | 19%(6/30)       | 0.045    |

Table S5 Standardized ORs evaluating the risk of patients in non-remission

| Characteristics | Risk of non-remission vs remission |              |          |
|-----------------|------------------------------------|--------------|----------|
|                 | OR                                 | 95% CI       | <i>P</i> |
| Age (mean±SD)   | 1.029                              | 0.874-1.213  | 0.730    |
| Gender          | 2.667                              | 0.415-17.120 | 0.301    |
| Systolic BP     | 1.043                              | 0.971-1.120  | 0.250    |
| Diastolic BP    | 1.016                              | 0.938-1.100  | 0.705    |
| Diabetes        | 0.673                              | 0.107-4.243  | 0.673    |
| HUA             | 2.307                              | 0.410-12.996 | 0.343    |
| HLP             | 0.188                              | 0.039-0.912  | 0.038    |
| OSAS            | 0.567                              | 0.114-2.809  | 0.487    |
| HINS            | 2.064                              | 0.173-24.596 | 0.567    |
| CircSAMD4A      | 13.795                             | 2.249-84.617 | 0.005    |

Table S6 miRNAs that might potentially bind to circSAMD4A

| miRNAs           | Score  |
|------------------|--------|
| hsa-miR-133a-5p  | -0.164 |
| hsa-miR-138-5p   | -0.160 |
| hsa-miR-942-3p   | -0.160 |
| hsa-miR-6131     | -0.146 |
| hsa-miR-7152-5p  | -0.126 |
| hsa-miR-6874-3p  | -0.116 |
| hsa-miR-1245b-3p | -0.111 |
| hsa-miR-148b-5p  | -0.098 |
| hsa-miR-4717-3p  | -0.098 |
| hsa-miR-4422     | -0.042 |

## Supplementary methods

### Definition of remission and non-remission in obese patients

Percentage excess weight loss (%EWL)= 100% × (baseline weight–last weight) / (baseline weight–ideal weight) [1], Baseline weight refers to preoperative weight, last weight equal to the current weight. In China, ideal weight (kg) for men as ideal weight = height (cm)-105, and for women as ideal weight = height (cm)-100 [2].

Reinhold et al [3] defined EWL%  $\geq 75\%$  as very good effect. As the above method is simple and practicable, it has been quoted widely and has become a standard. Therefore we defined EWL%  $\geq 75\%$  as remission, and EWL%  $\leq 75\%$  as non-remission.

### References

1. Weigley ES. Average? Ideal? Desirable? A brief overview of height-weight tables in the United States. *J Am Diet Assoc.* 1984; 84: 417-23.
2. Nowaczyk P, Murawa D, Połom K, Waszyk-Nowaczyk M, Spychała A, Michalak M, et al. Analysis of sentinel lymph node biopsy results in colon cancer in regard of the anthropometric features of the population and body composition assessment formulas. *Langenbecks Arch Surg.* 2012; 397: 779-86.
3. Reinhold RB. Critical analysis of long term weight loss following gastric bypass. *Surg Gynecol Obstet.* 1982; 155: 385-94.
